# Supplementary material for: Synthesis of Binaphthyl‐Based Push‐Pull Chromophores with Supramolecularly Polarizable Acceptor Ends
Source: Hindawi journal article supplement (doi:10.1155/2015/827592), 2015-01-01

*Supporting Information for:*

Synthesis of Binaphthyl-Based Push-Pull Chromophores with Supramolecularly Polarizable Acceptor Ends

Carmine Coluccini,*,a,b Giancarlo Terraneo,c and Dario Pasini*,a,d

*a) Department of Chemistry, University of Pavia, Viale Taramelli, 10 –27100– Pavia, Italy. E-mail: dario.pasini@unipv.it. Homepage:* [*www.unipv.it/labt*](http://www.unipv.it/labt)

*b) Current address:* *IMDEA Materials, C/ Eric Kandel, 2, Tecnogetafe, 28906 Getafe, Madrid – Spain. E-mail: carmine.coluccini@imdea.org*

*c) Dipartimento di Chimica, Materiali ed Ingegneria Chimica "G. Natta", Politecnico di Milano, via L. Mancinelli, 7 –20131– Milano, Italy. . E-mail: giancarlo.terraneo@polimi.it*

*d) INSTM Research Unit, University of Pavia, Italy.*


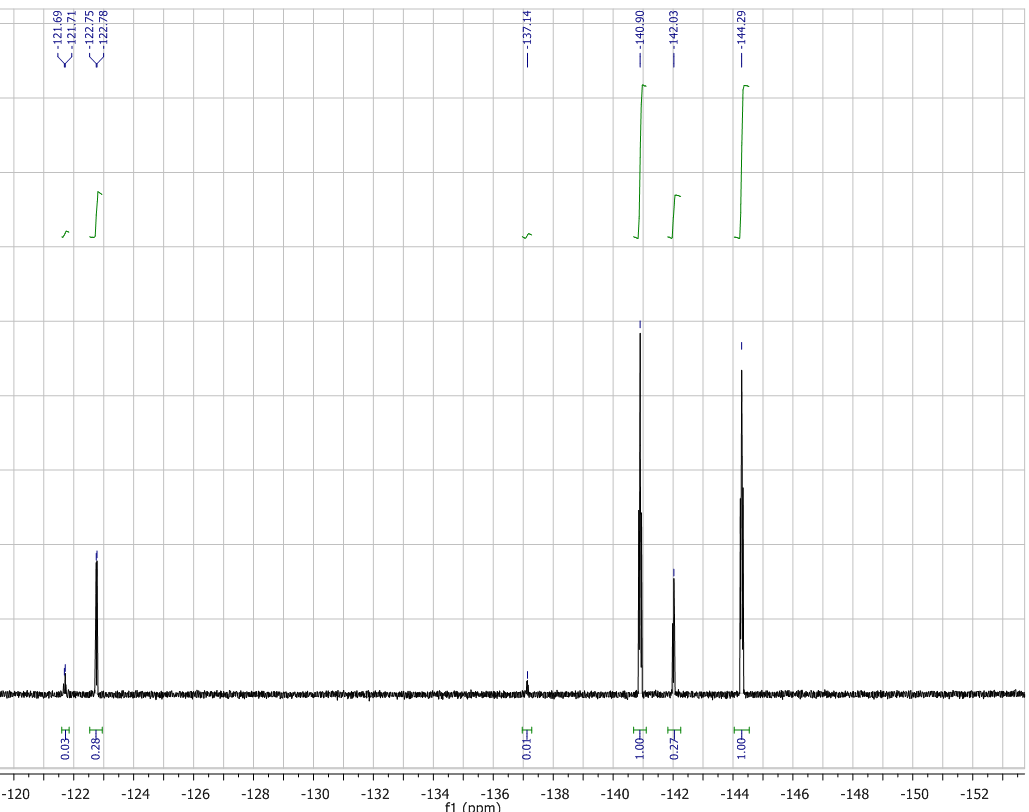


**Figure S1.** 19F-NMR (400 MHz) spectrum in CDCl3 for the mixture of hydrogenated/iodinated of compound **9b**.

*Copies of NMR data for newly synthesized compounds*

Compound **1b**


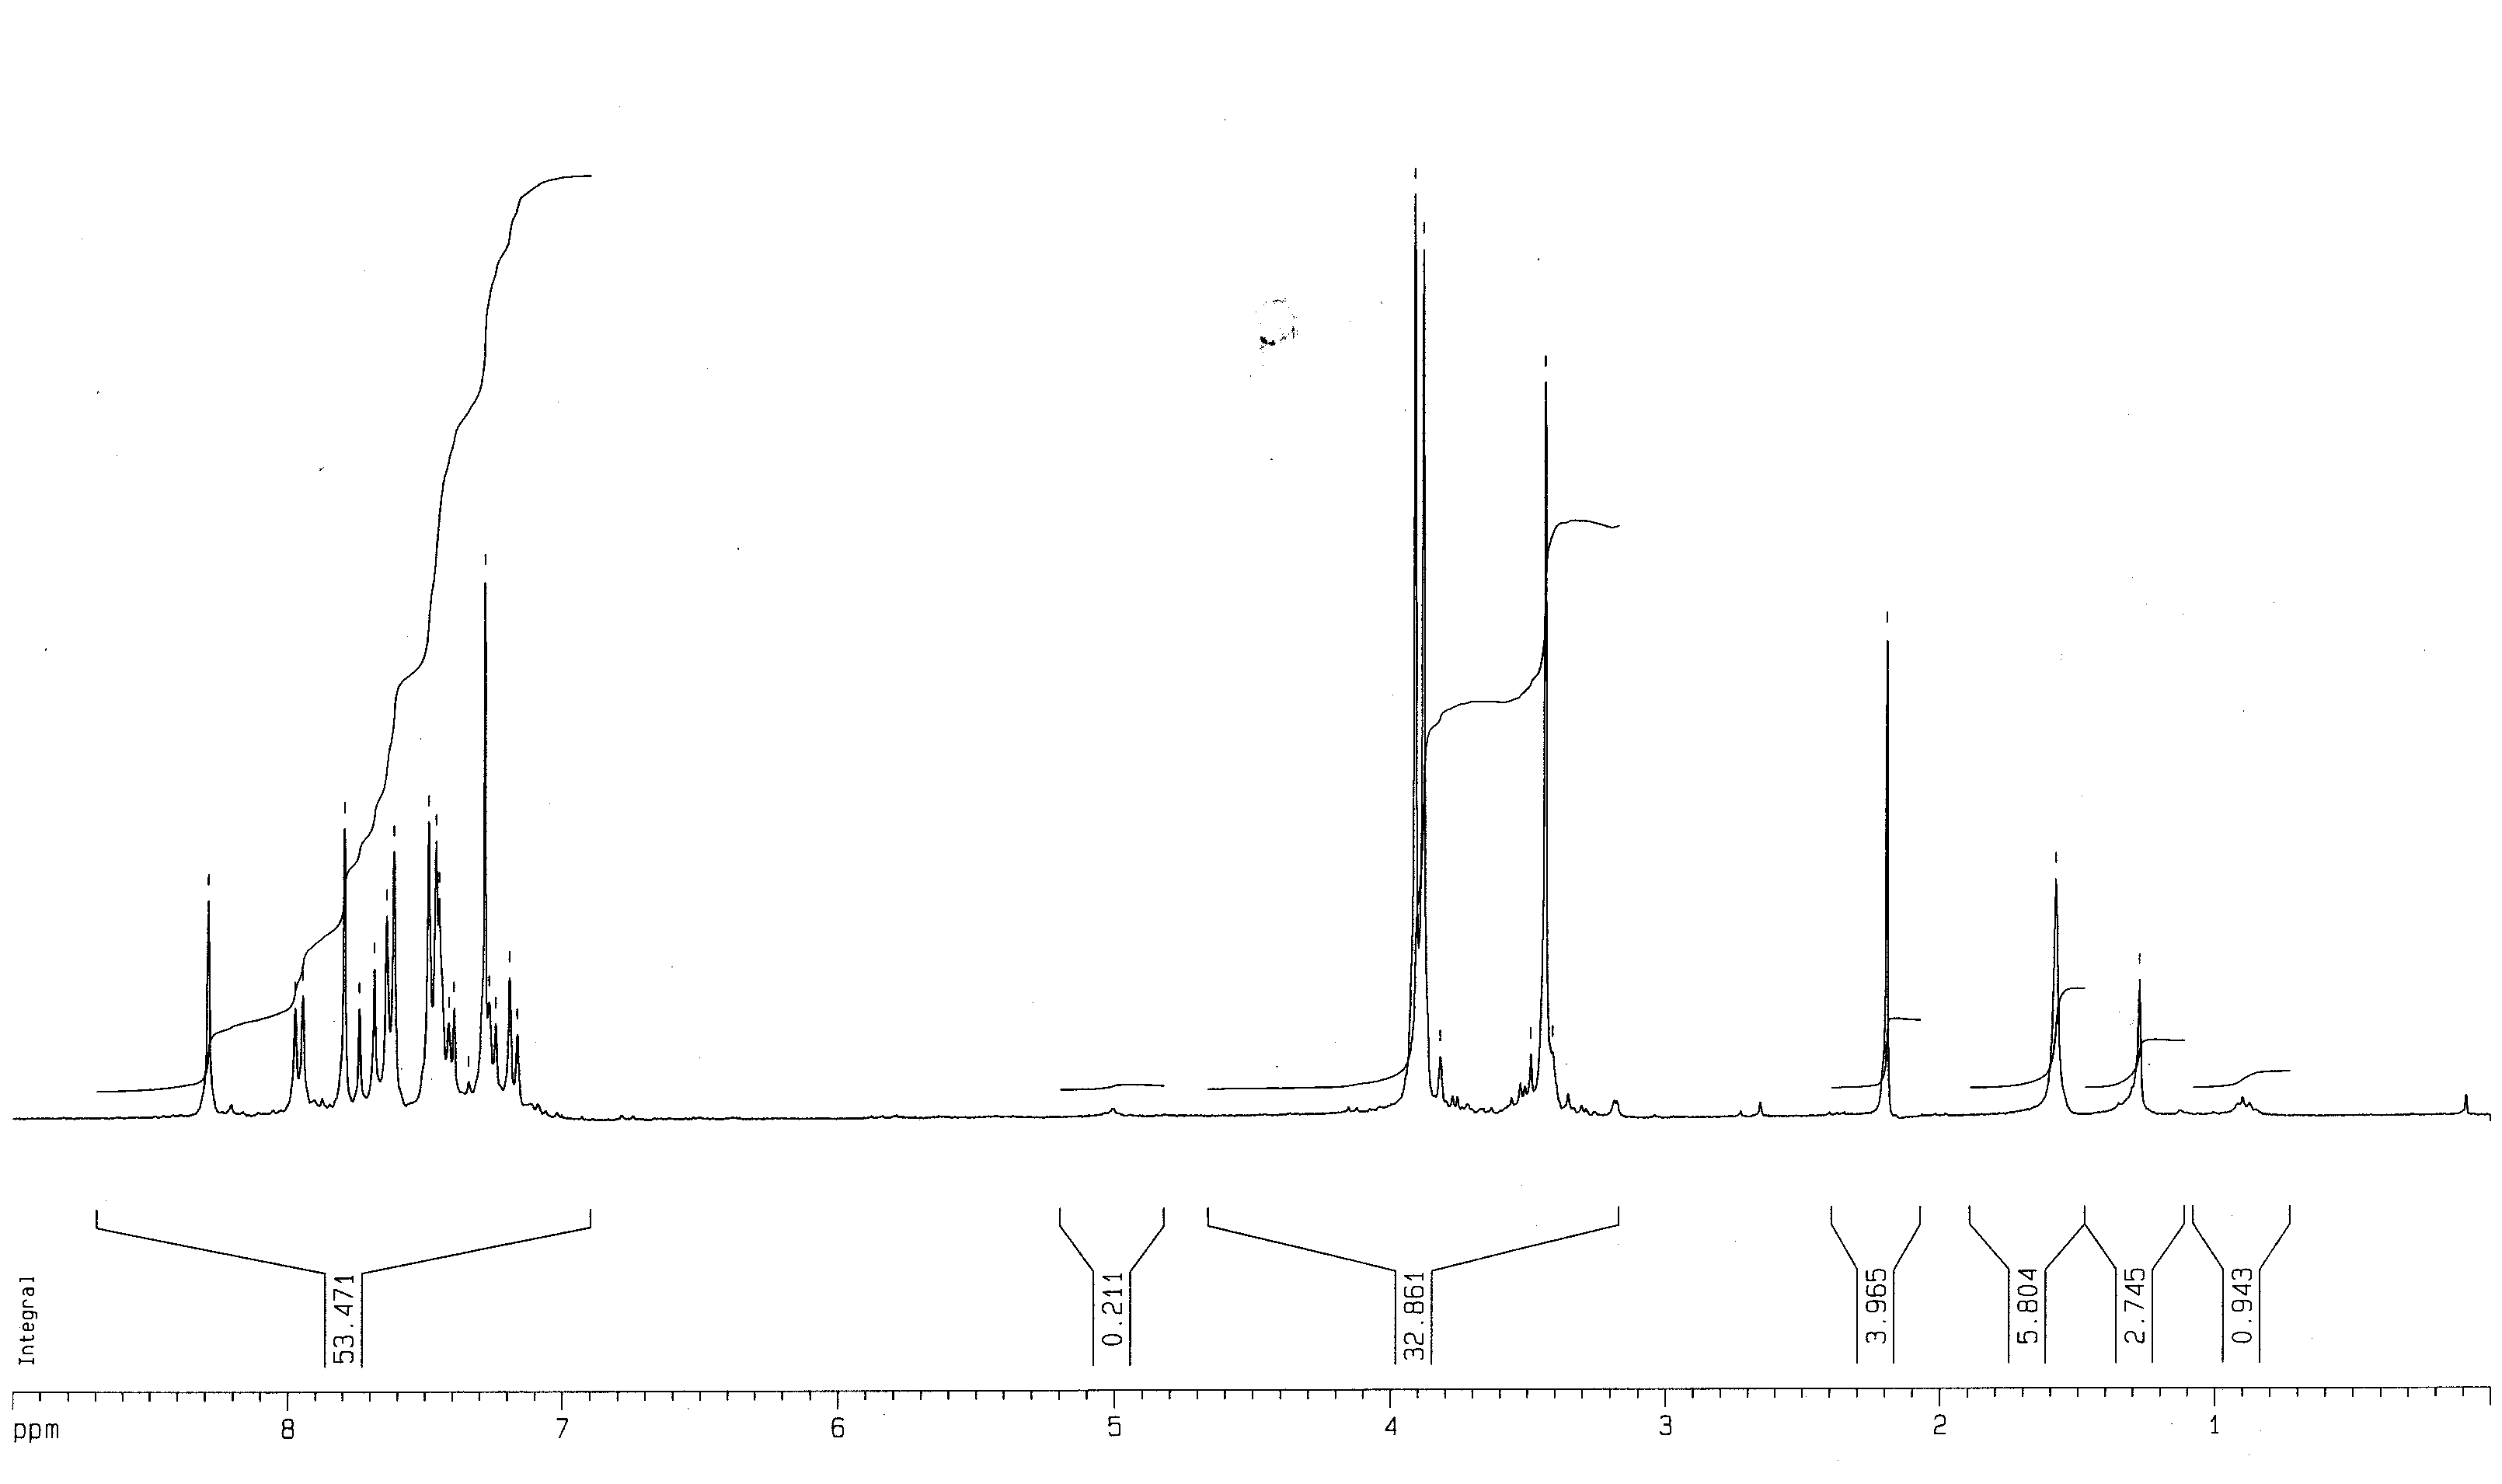


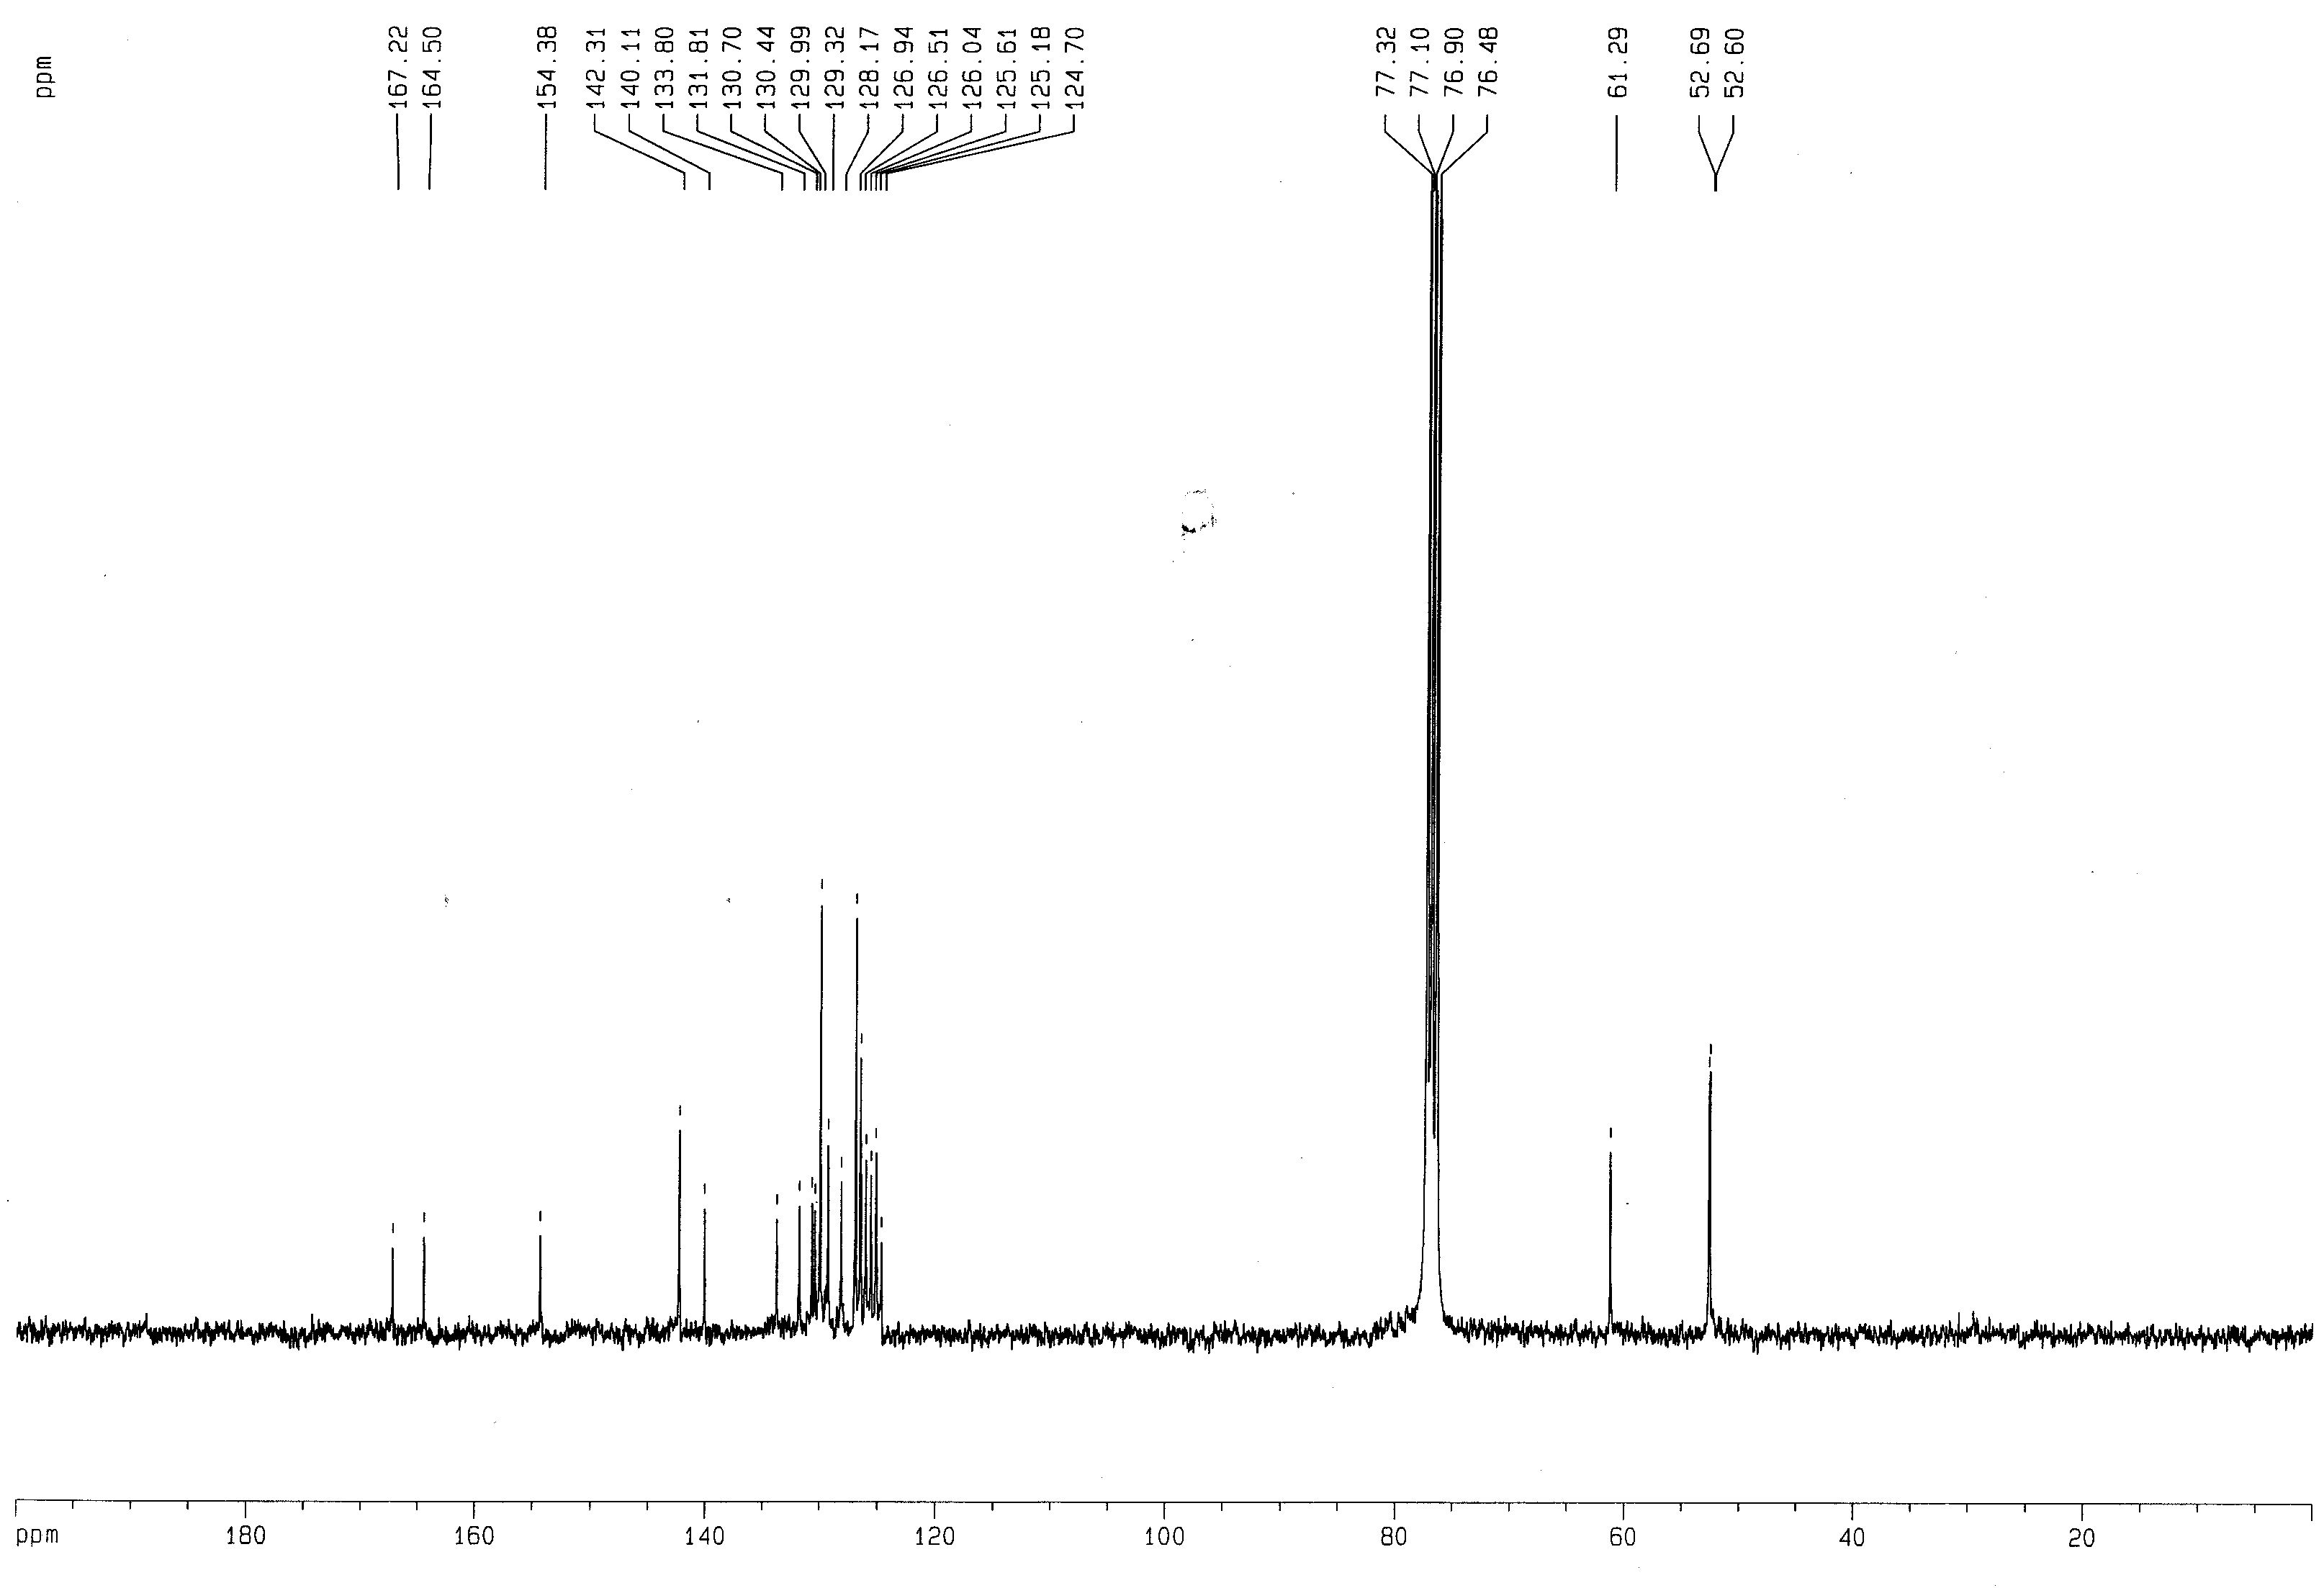


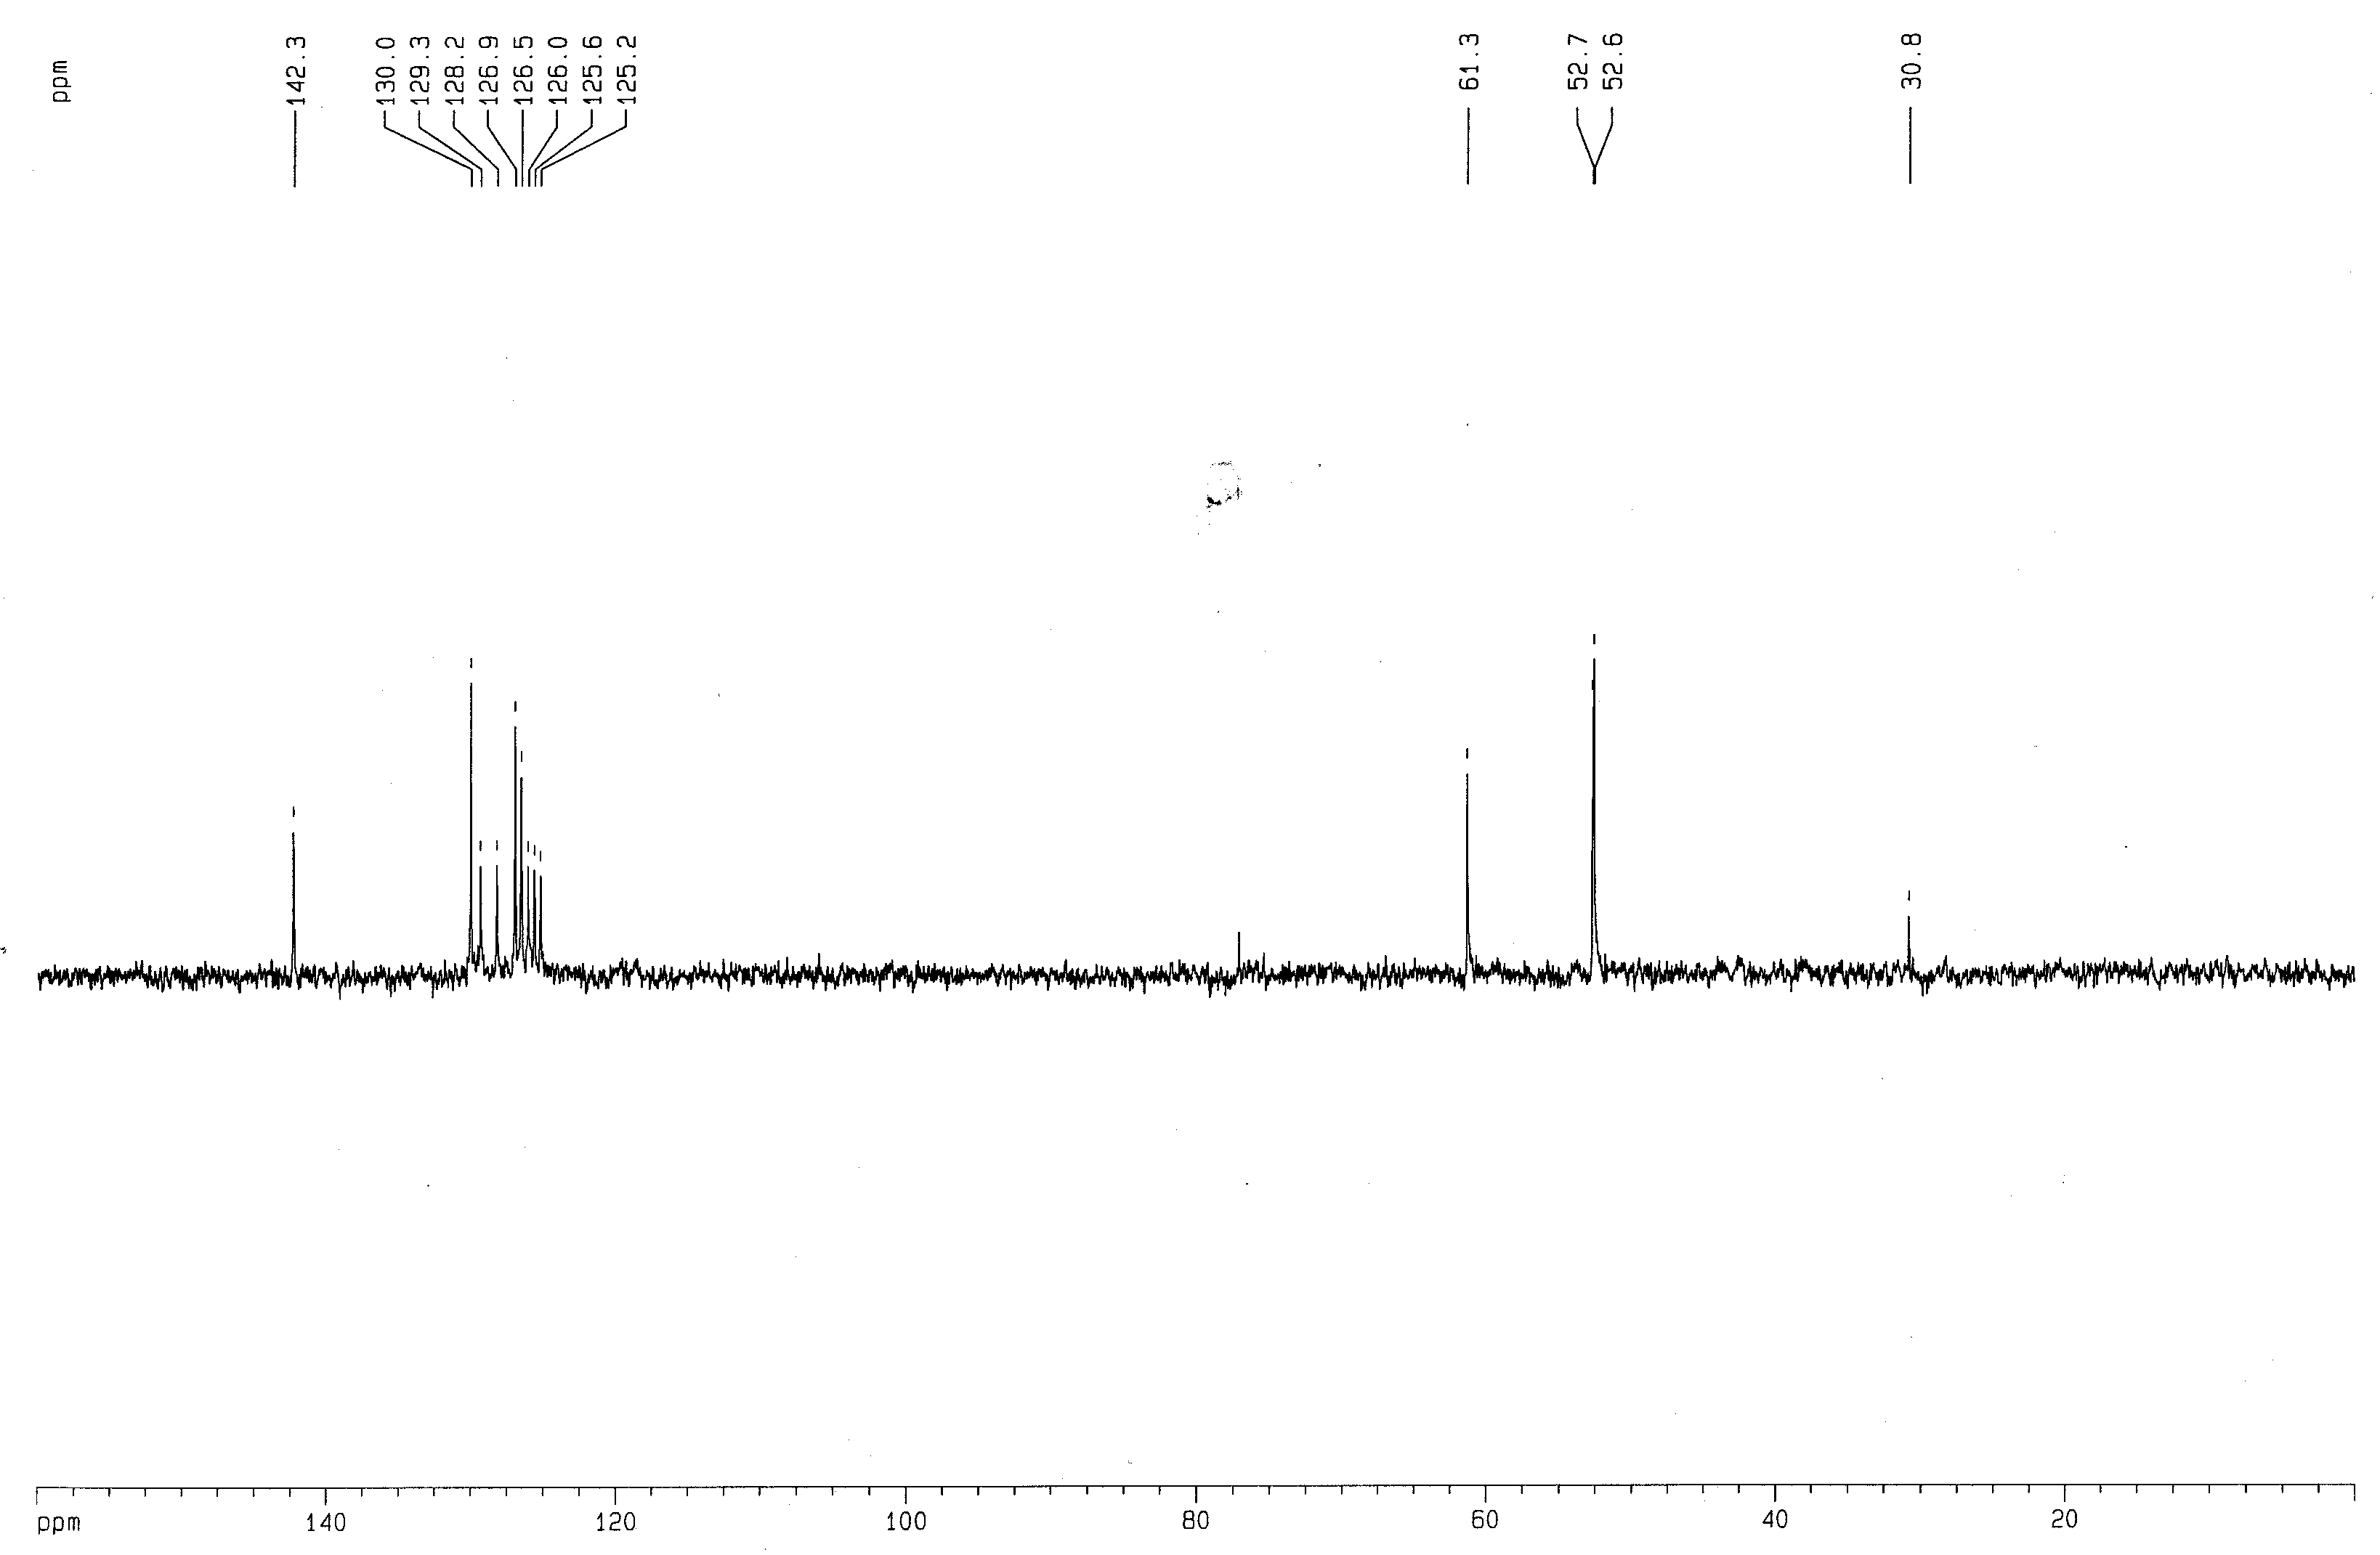


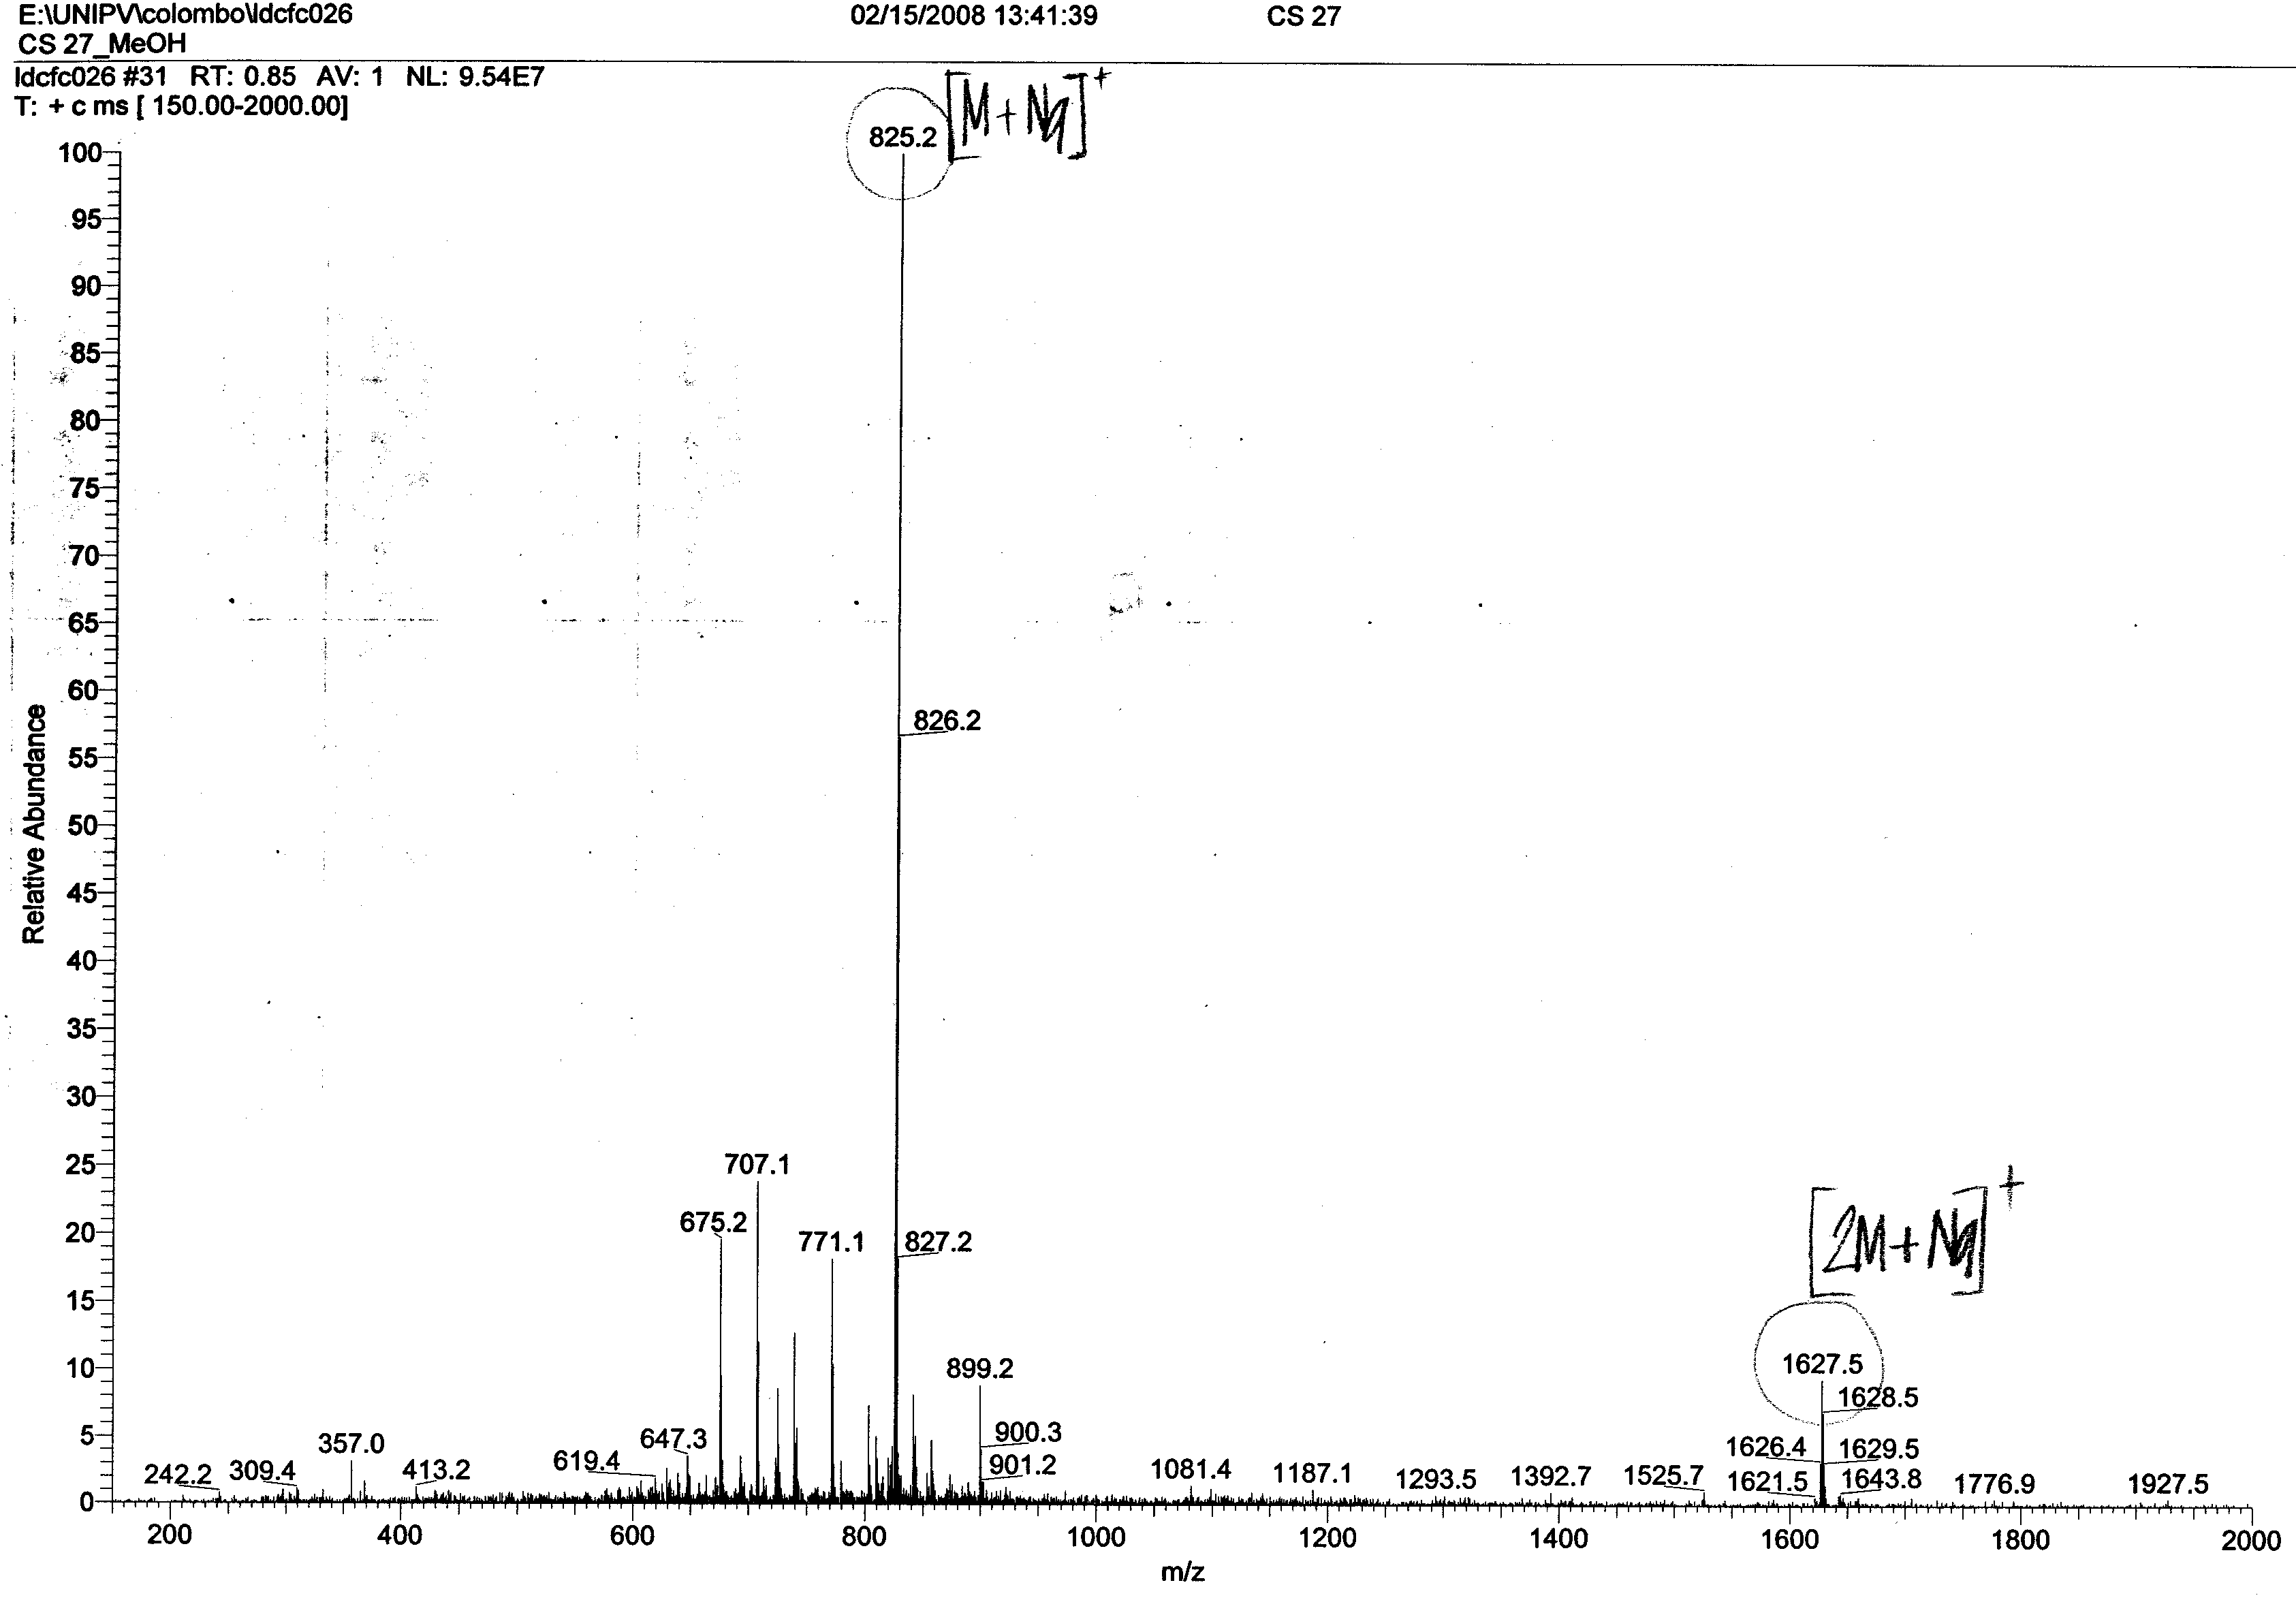


Compound **6**

**
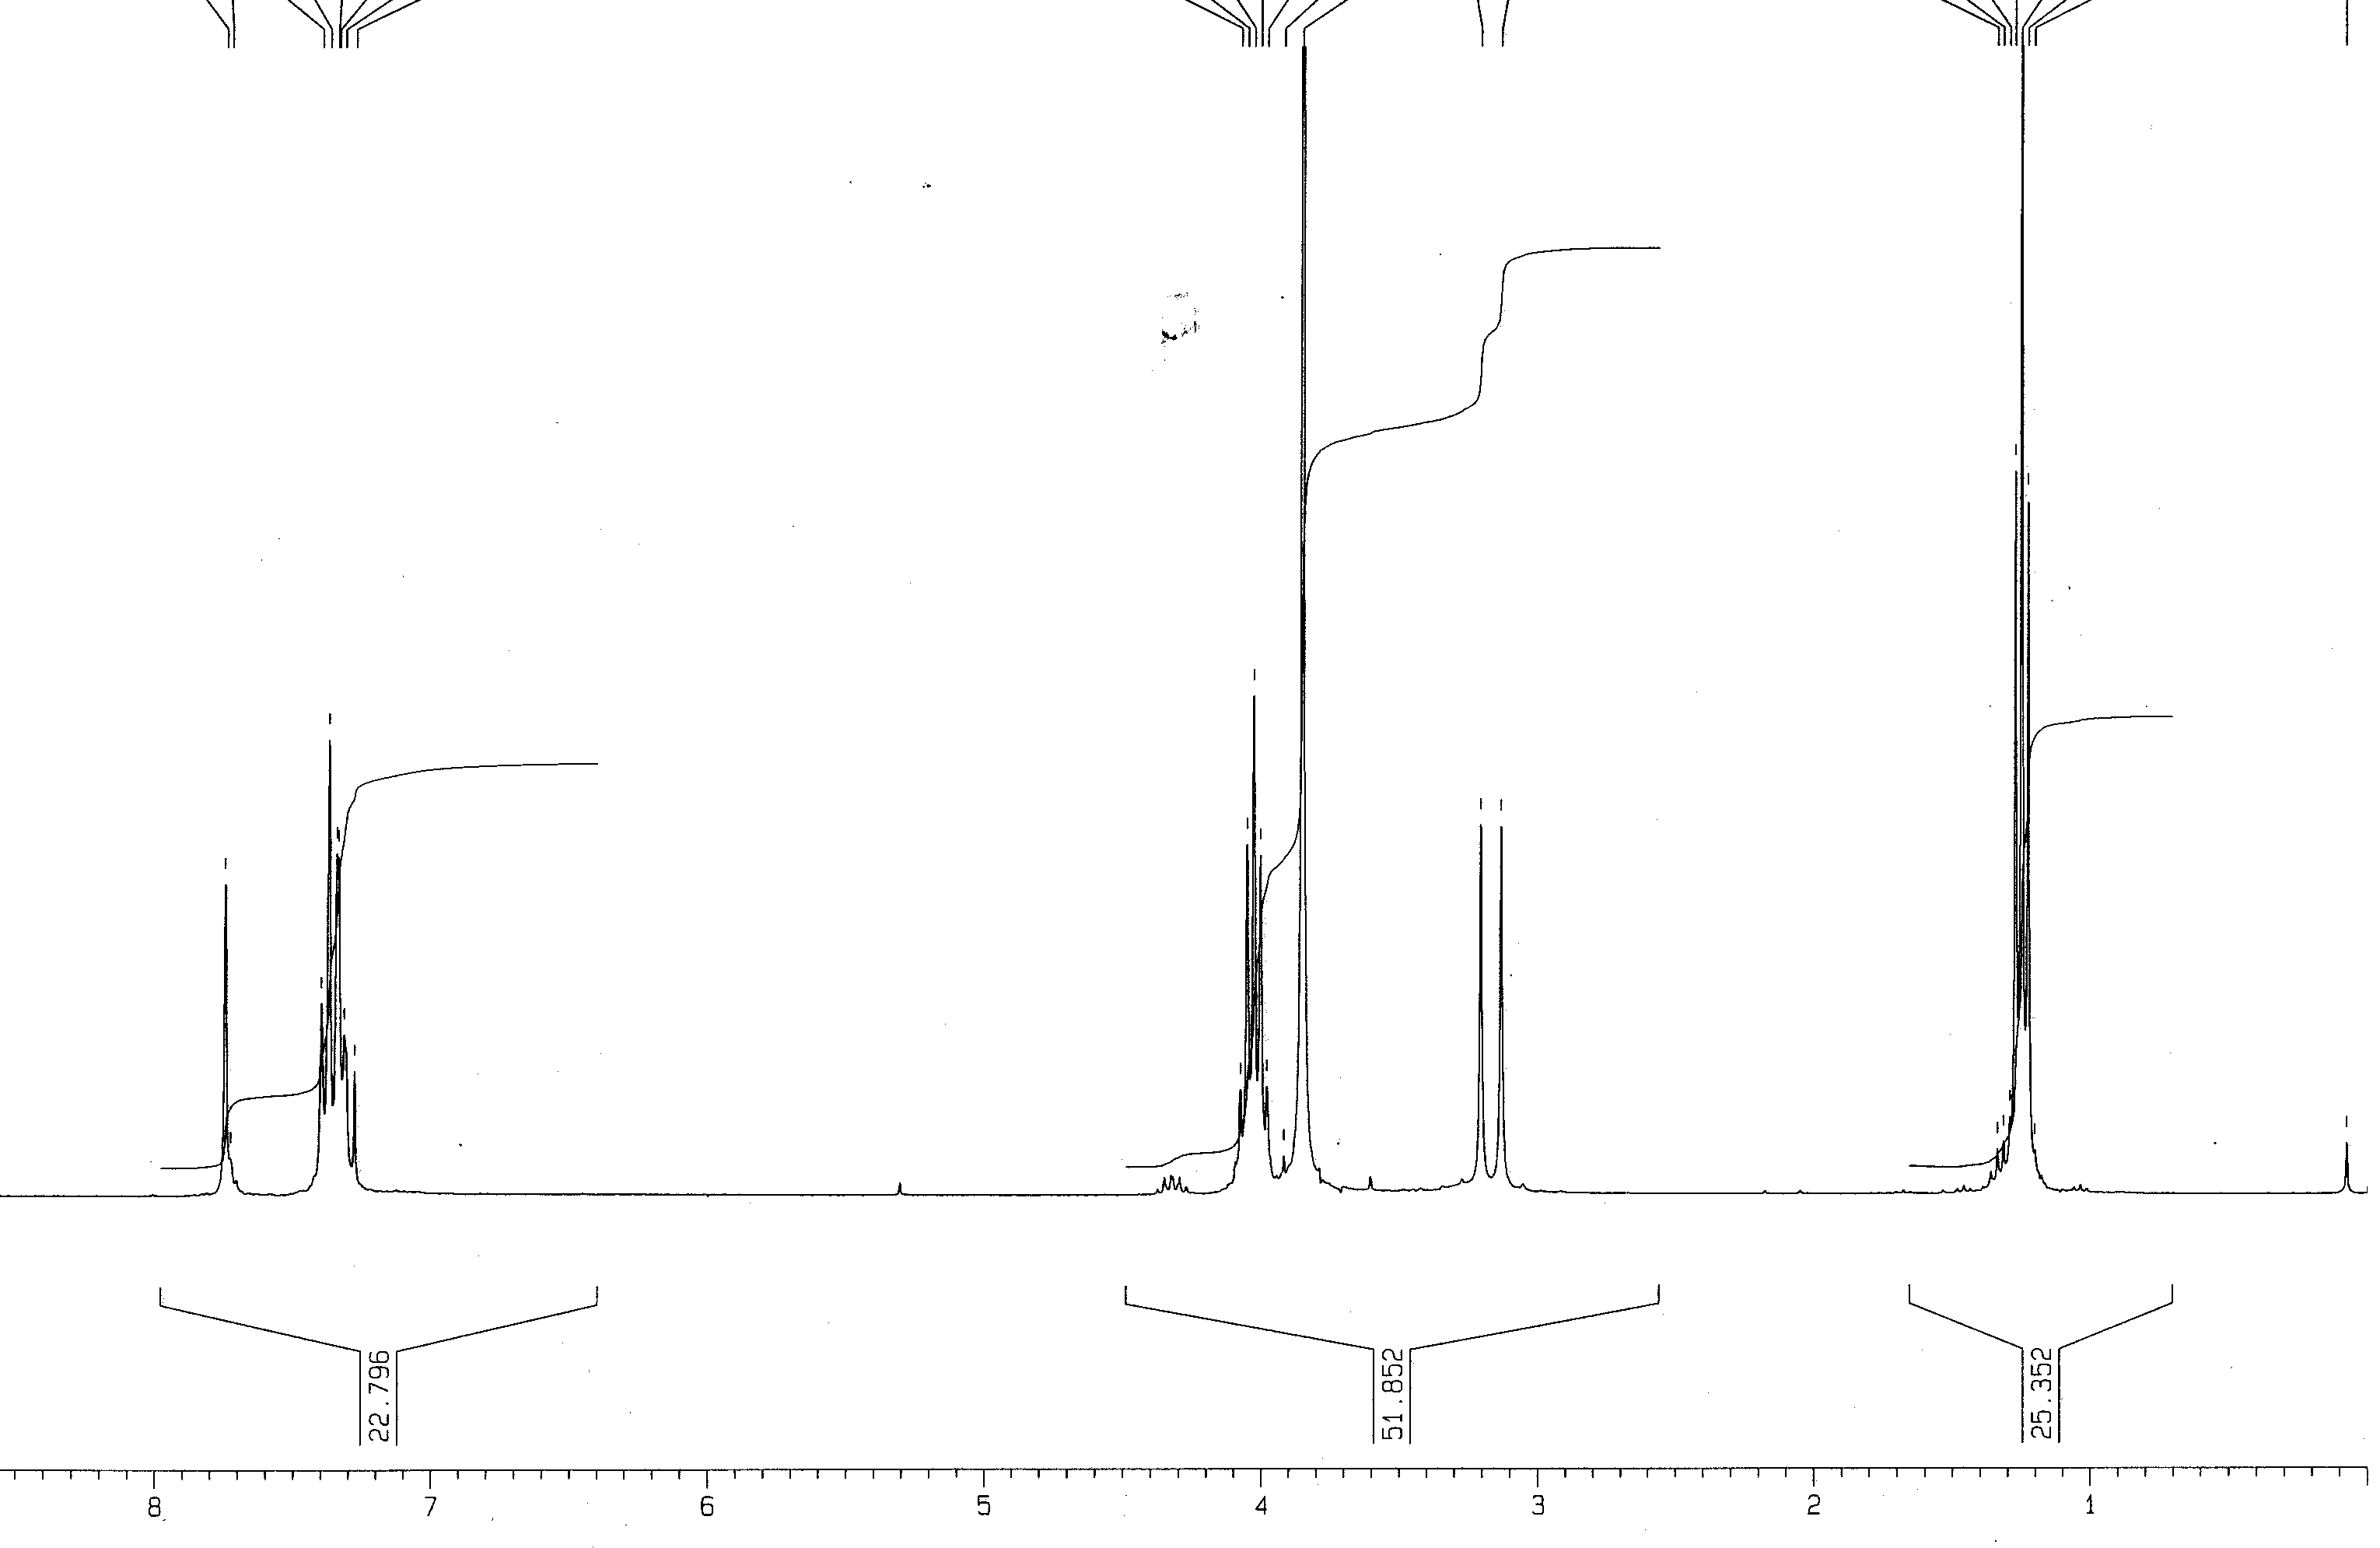
**

**
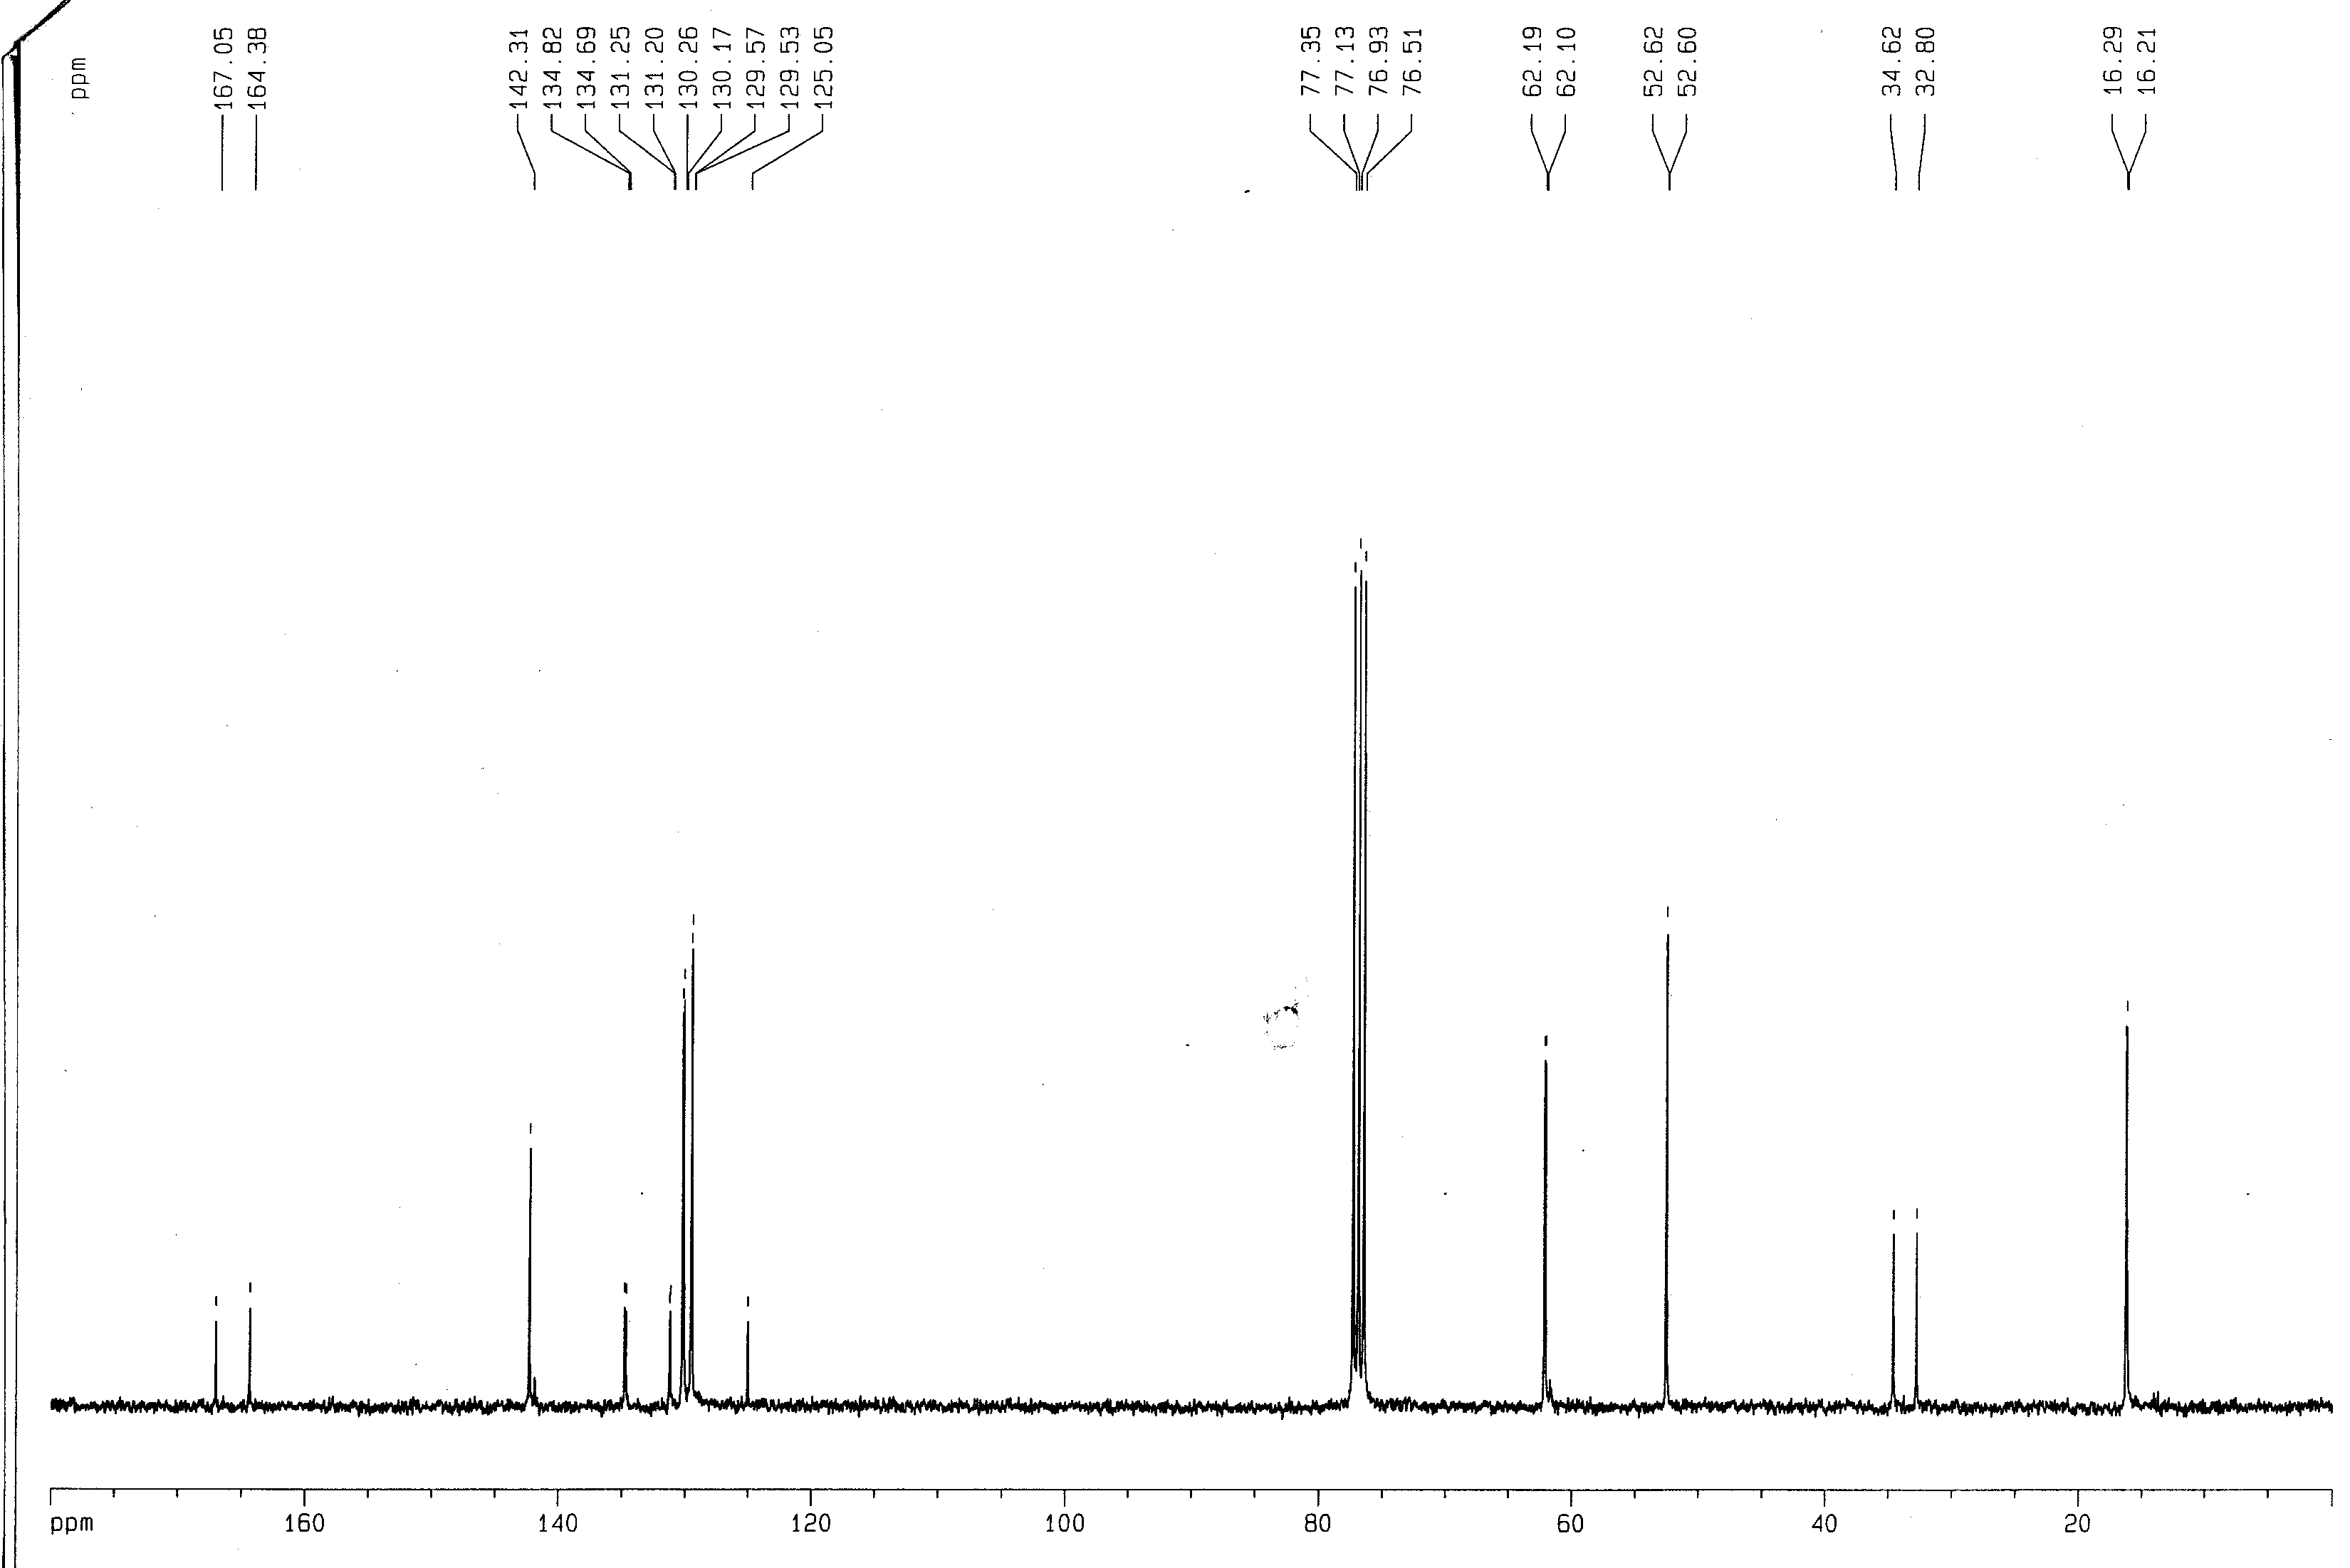
**

Compound **7**


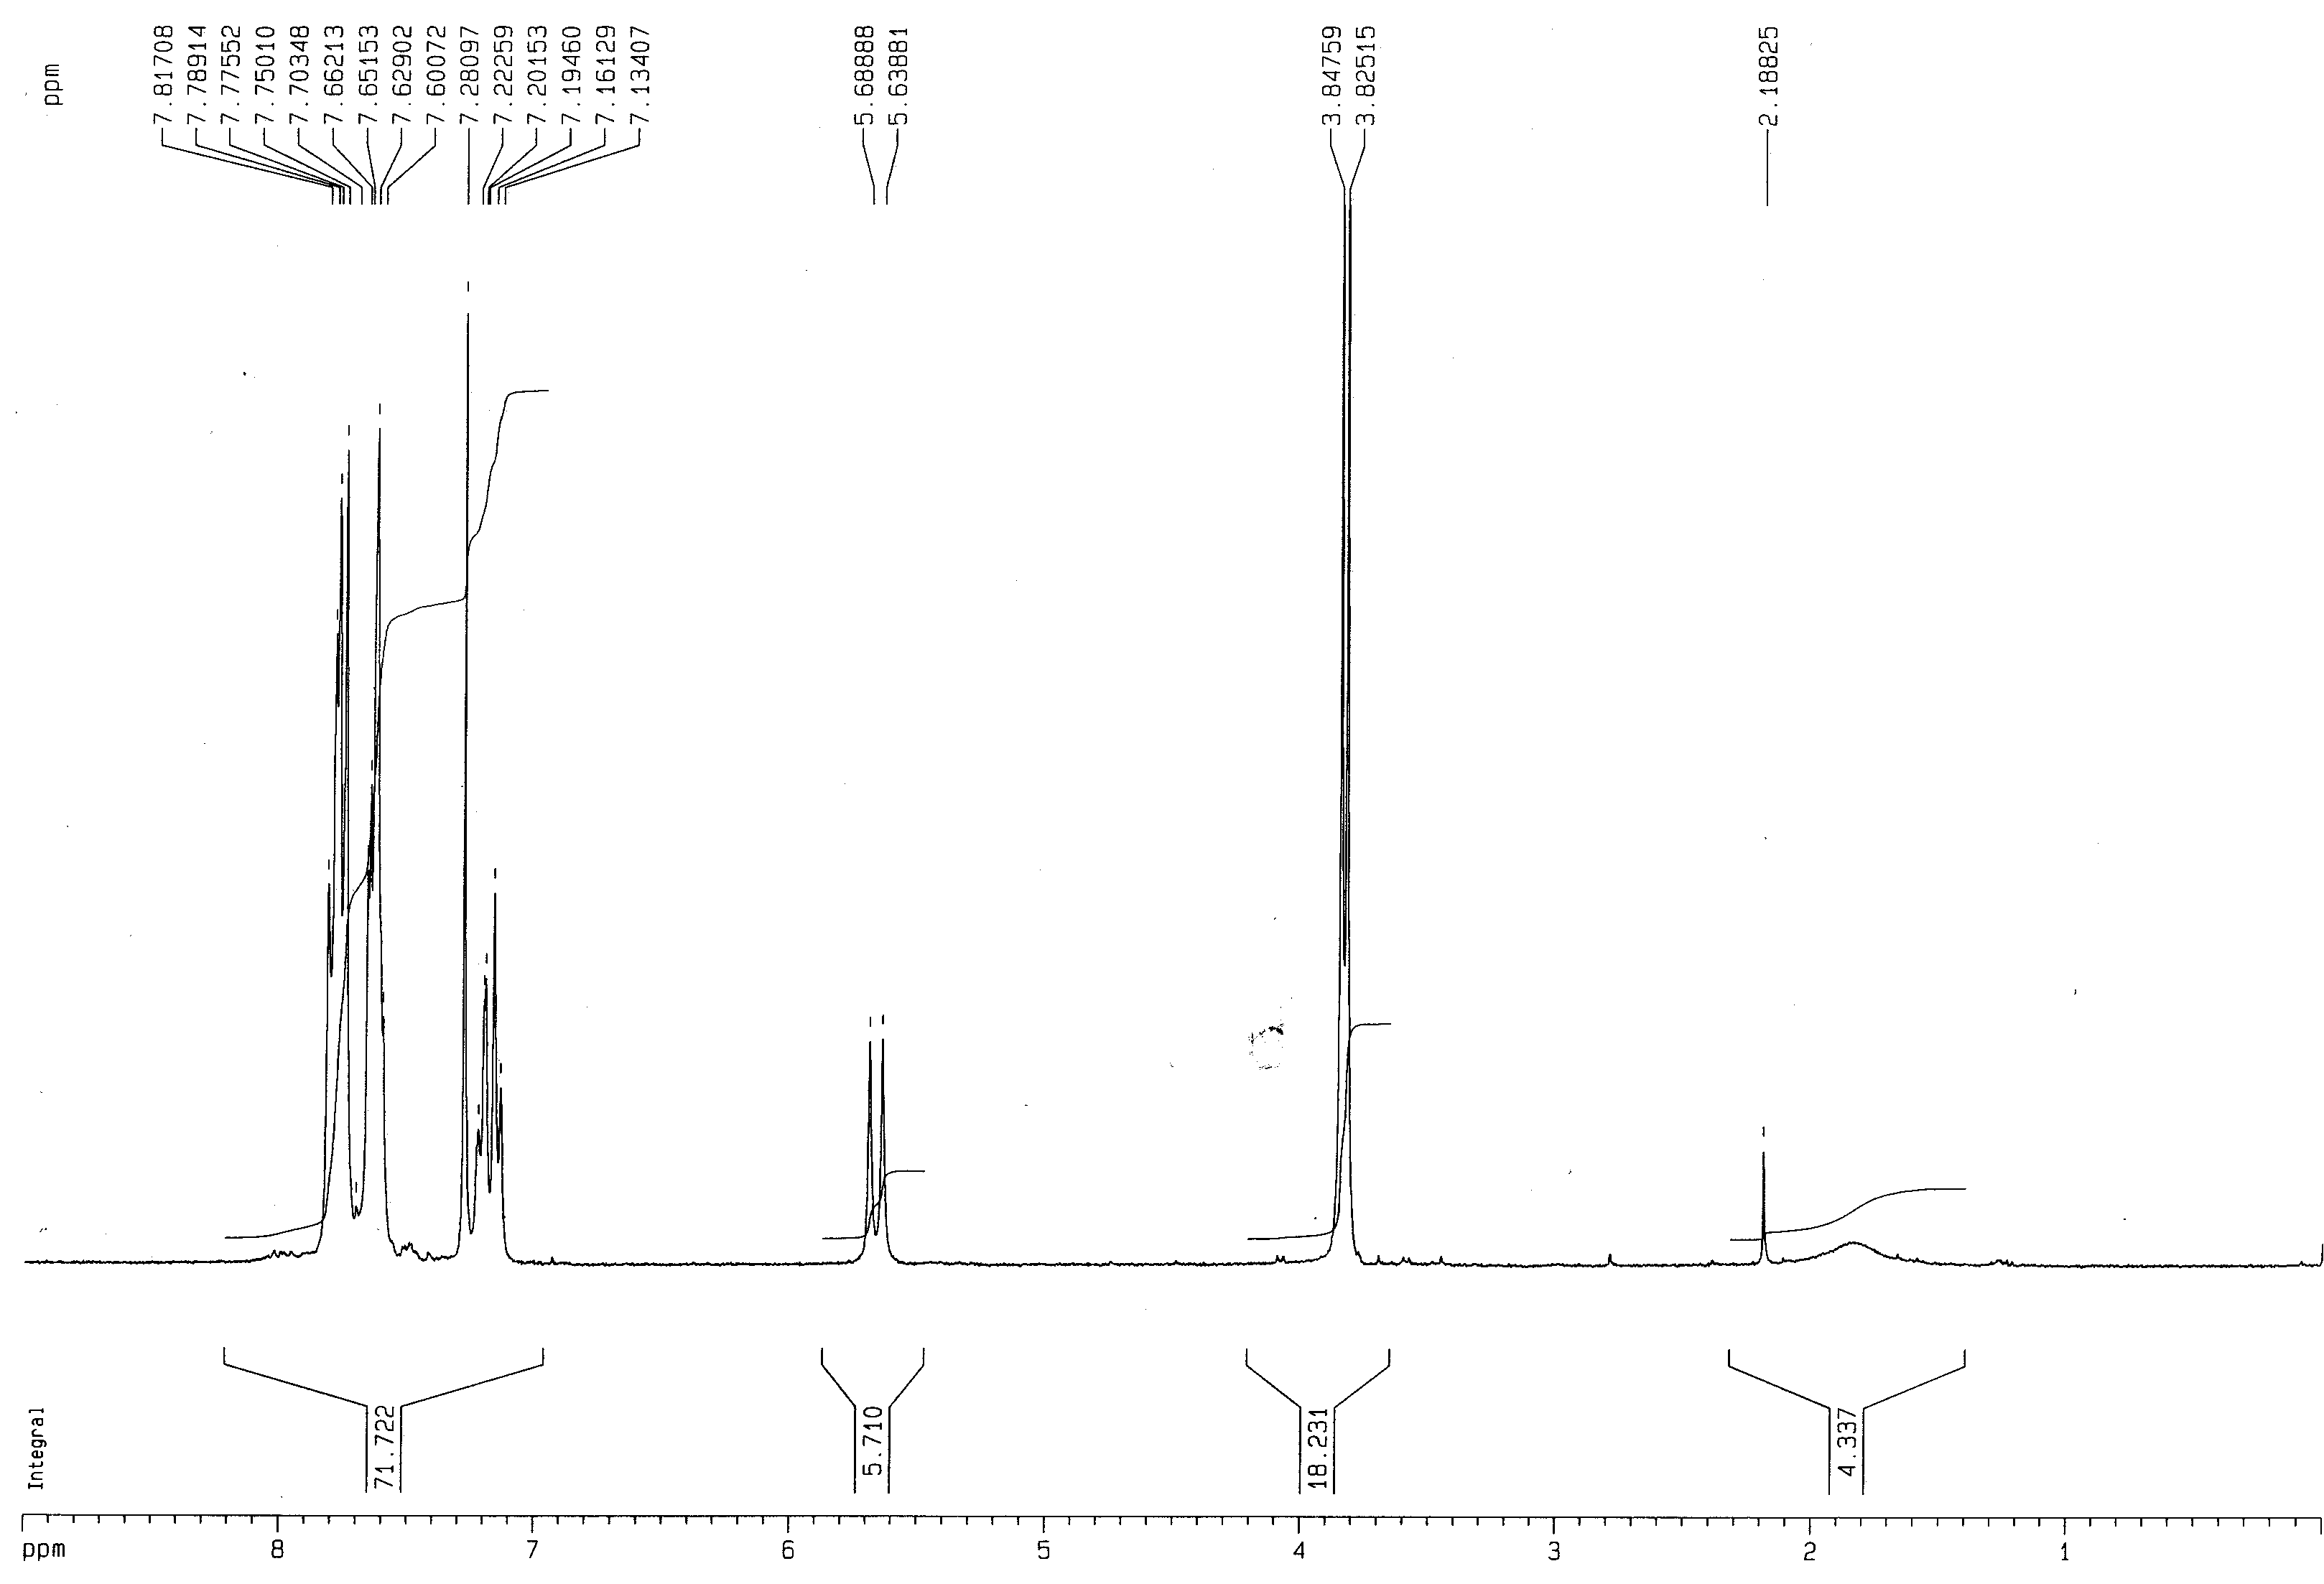


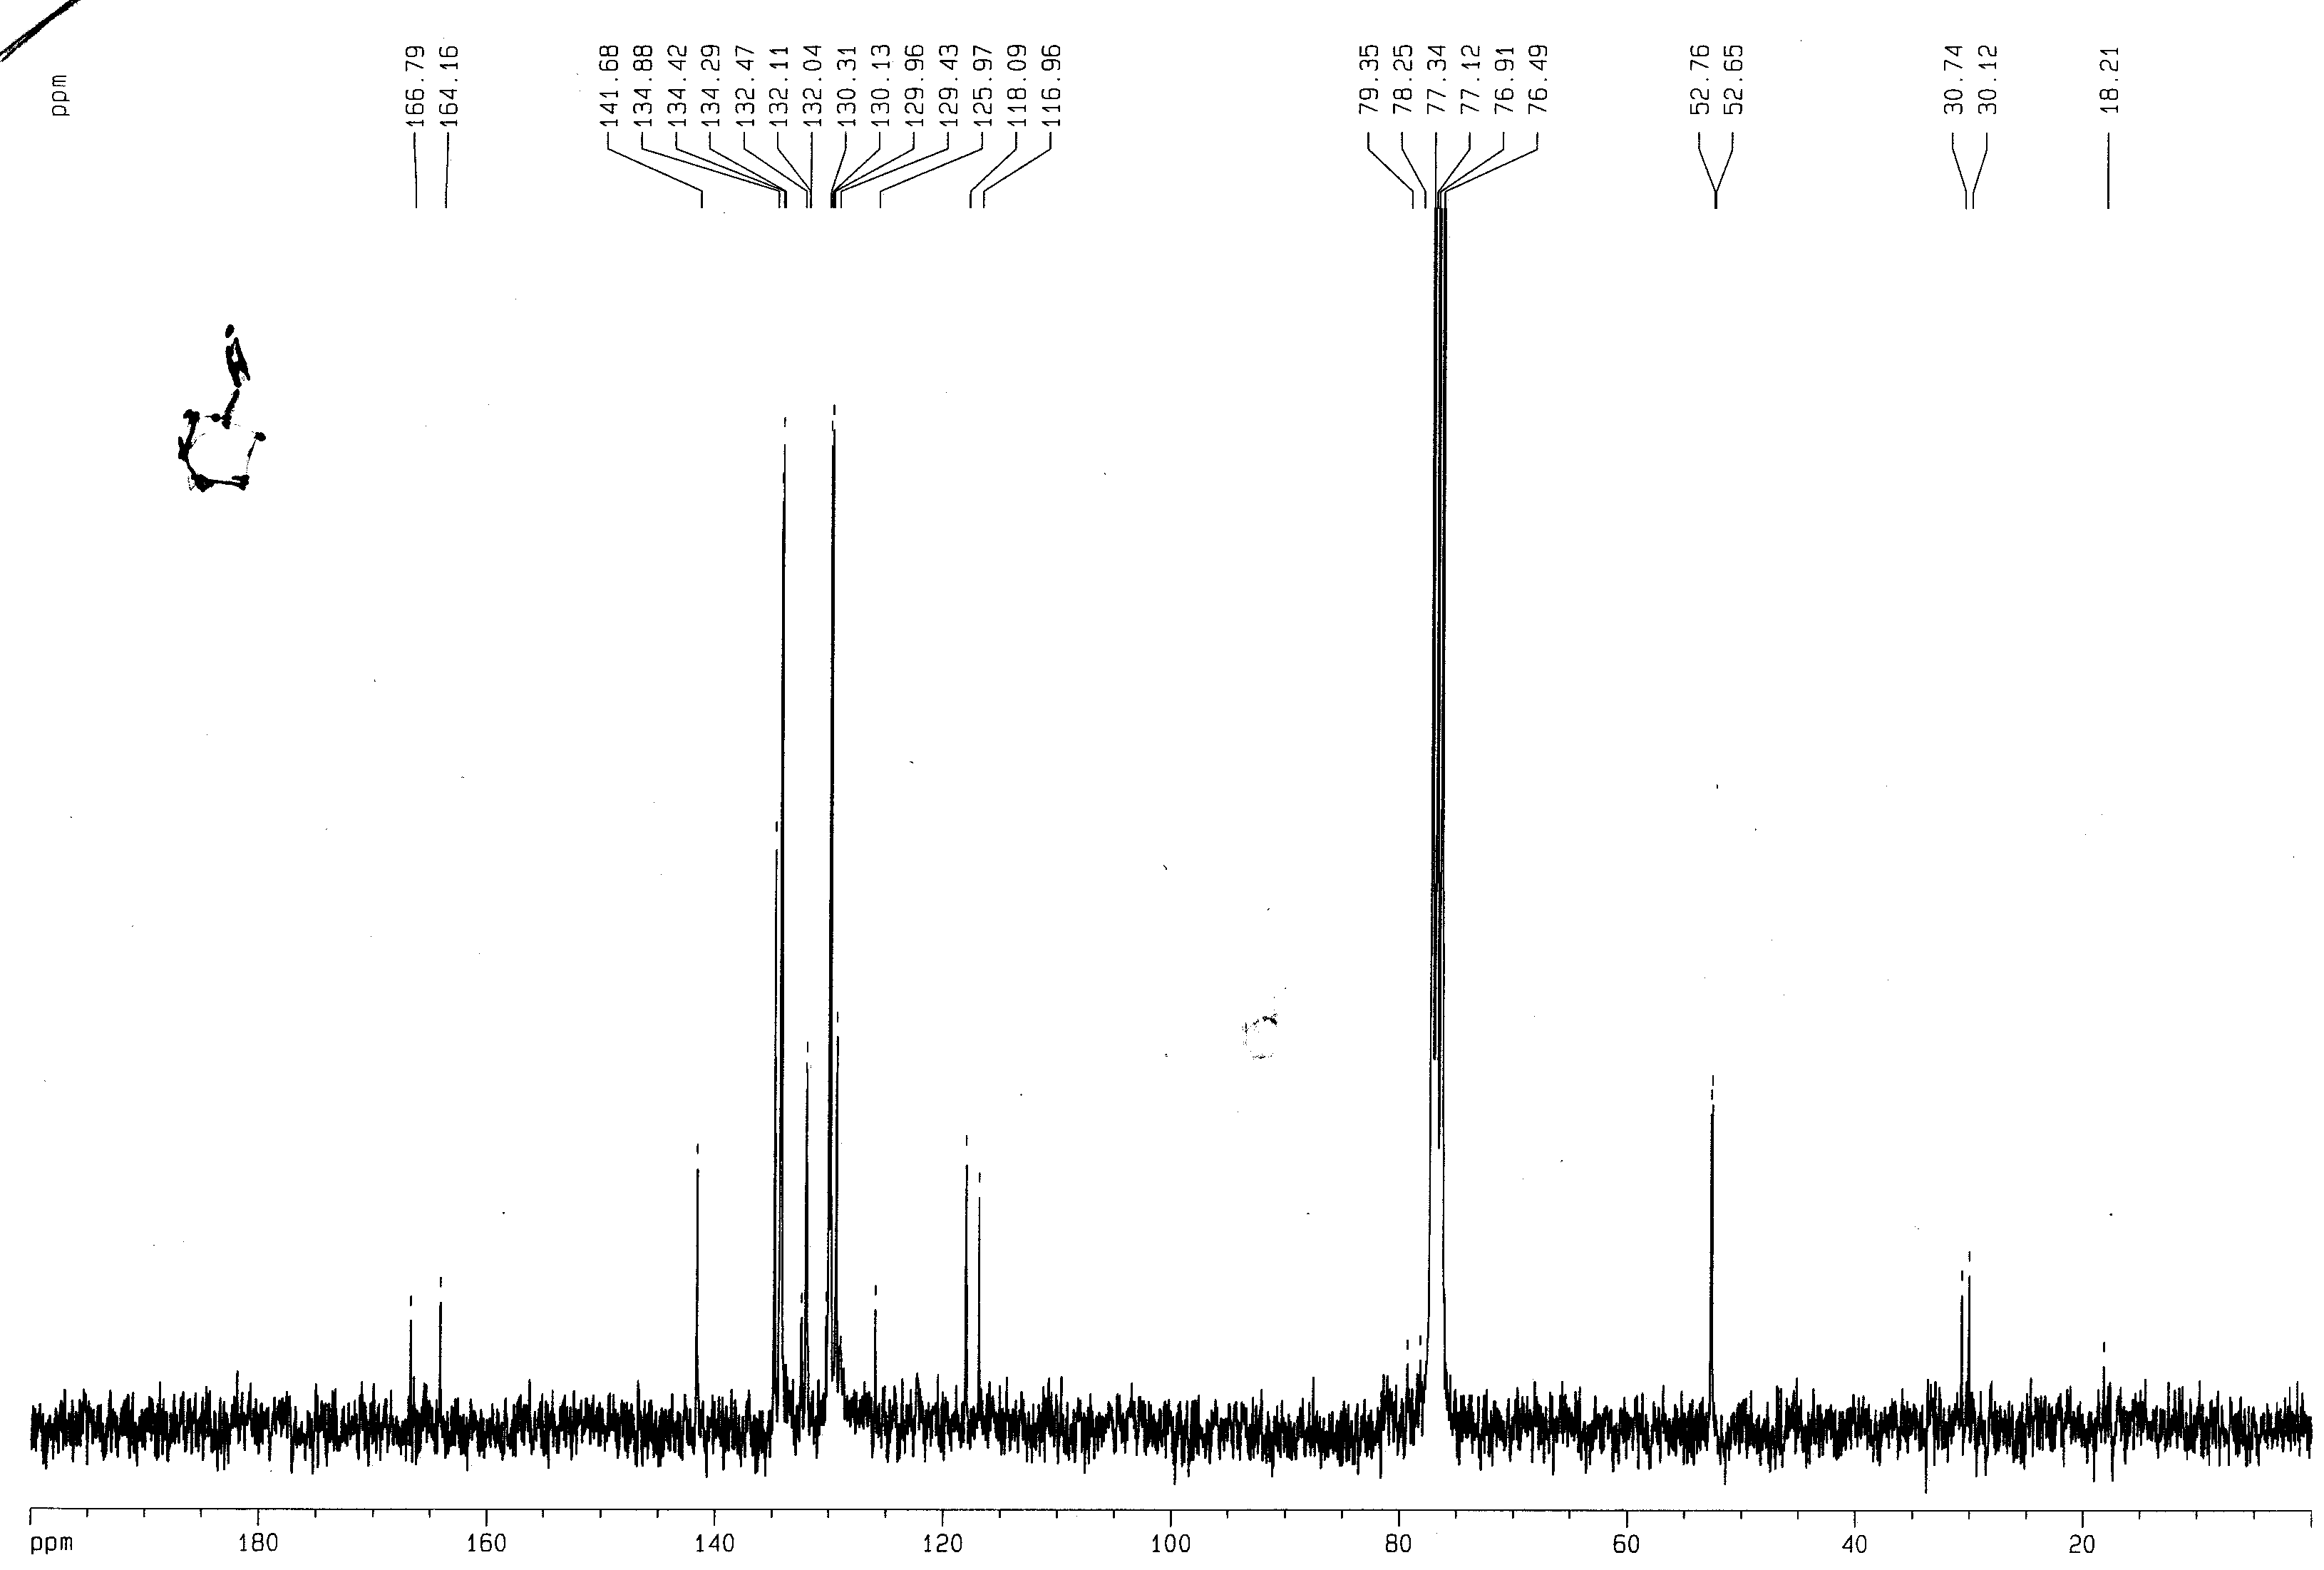


Compound **9a**


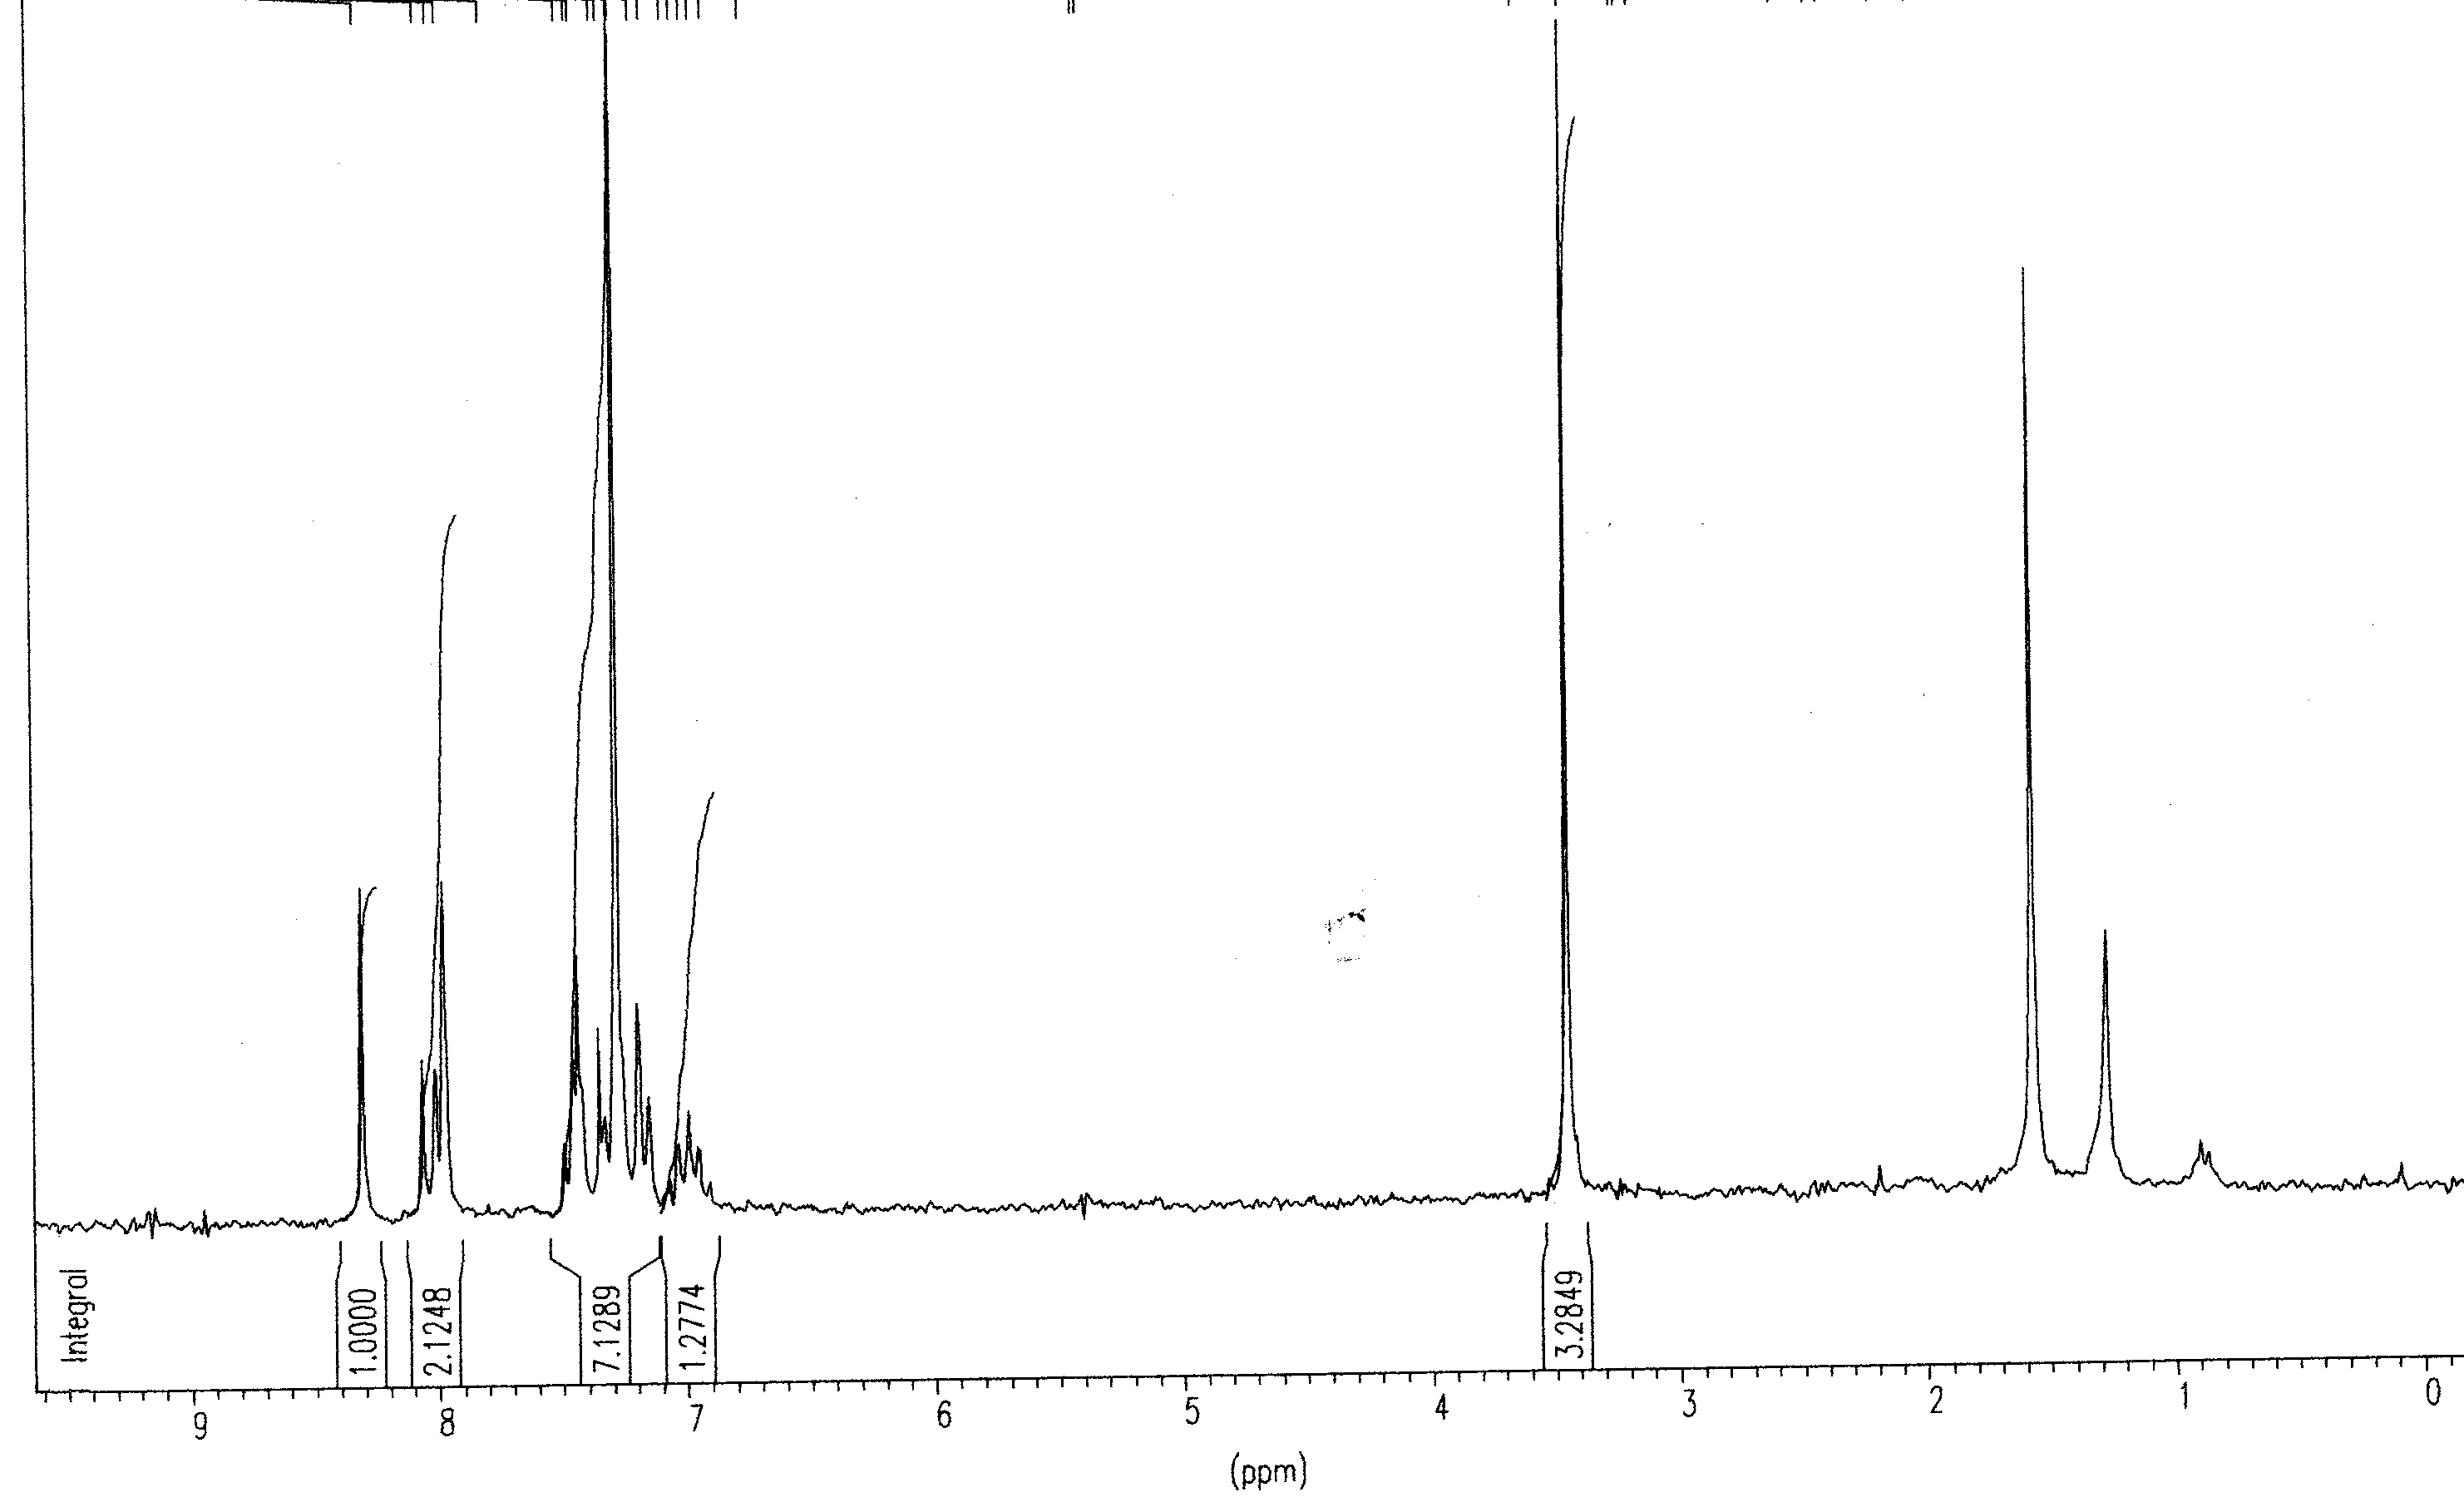


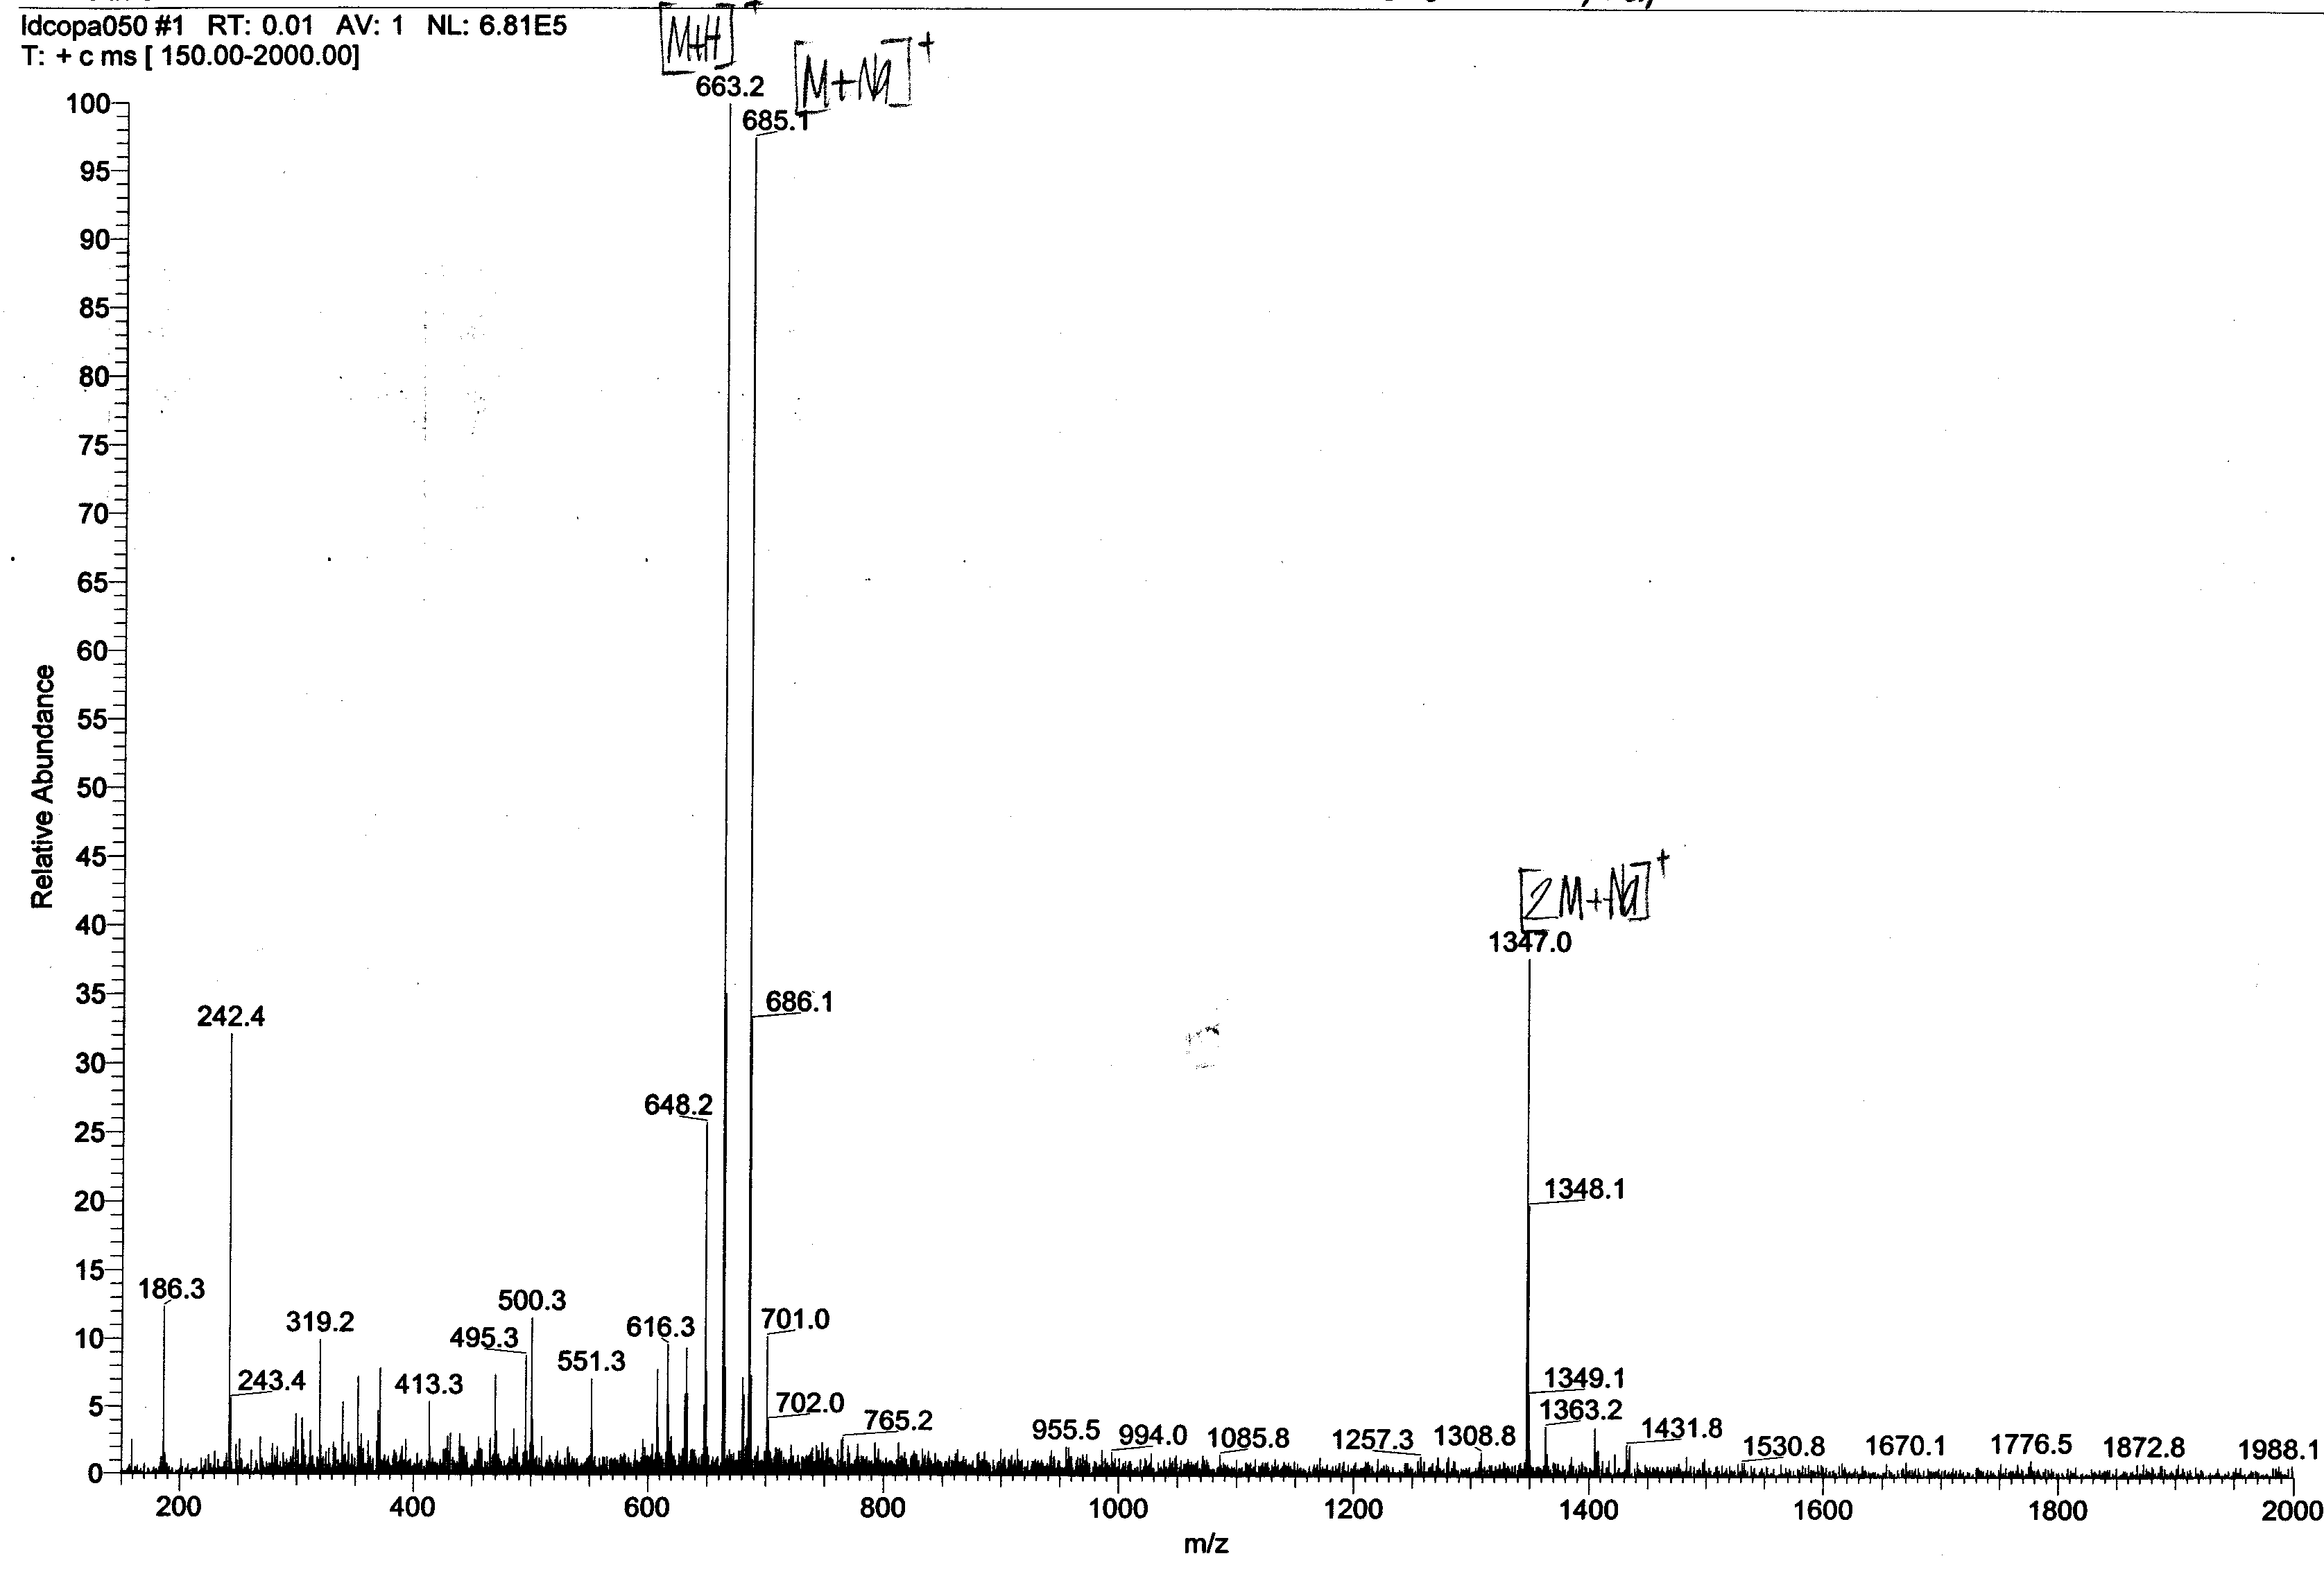


Compound **9b**


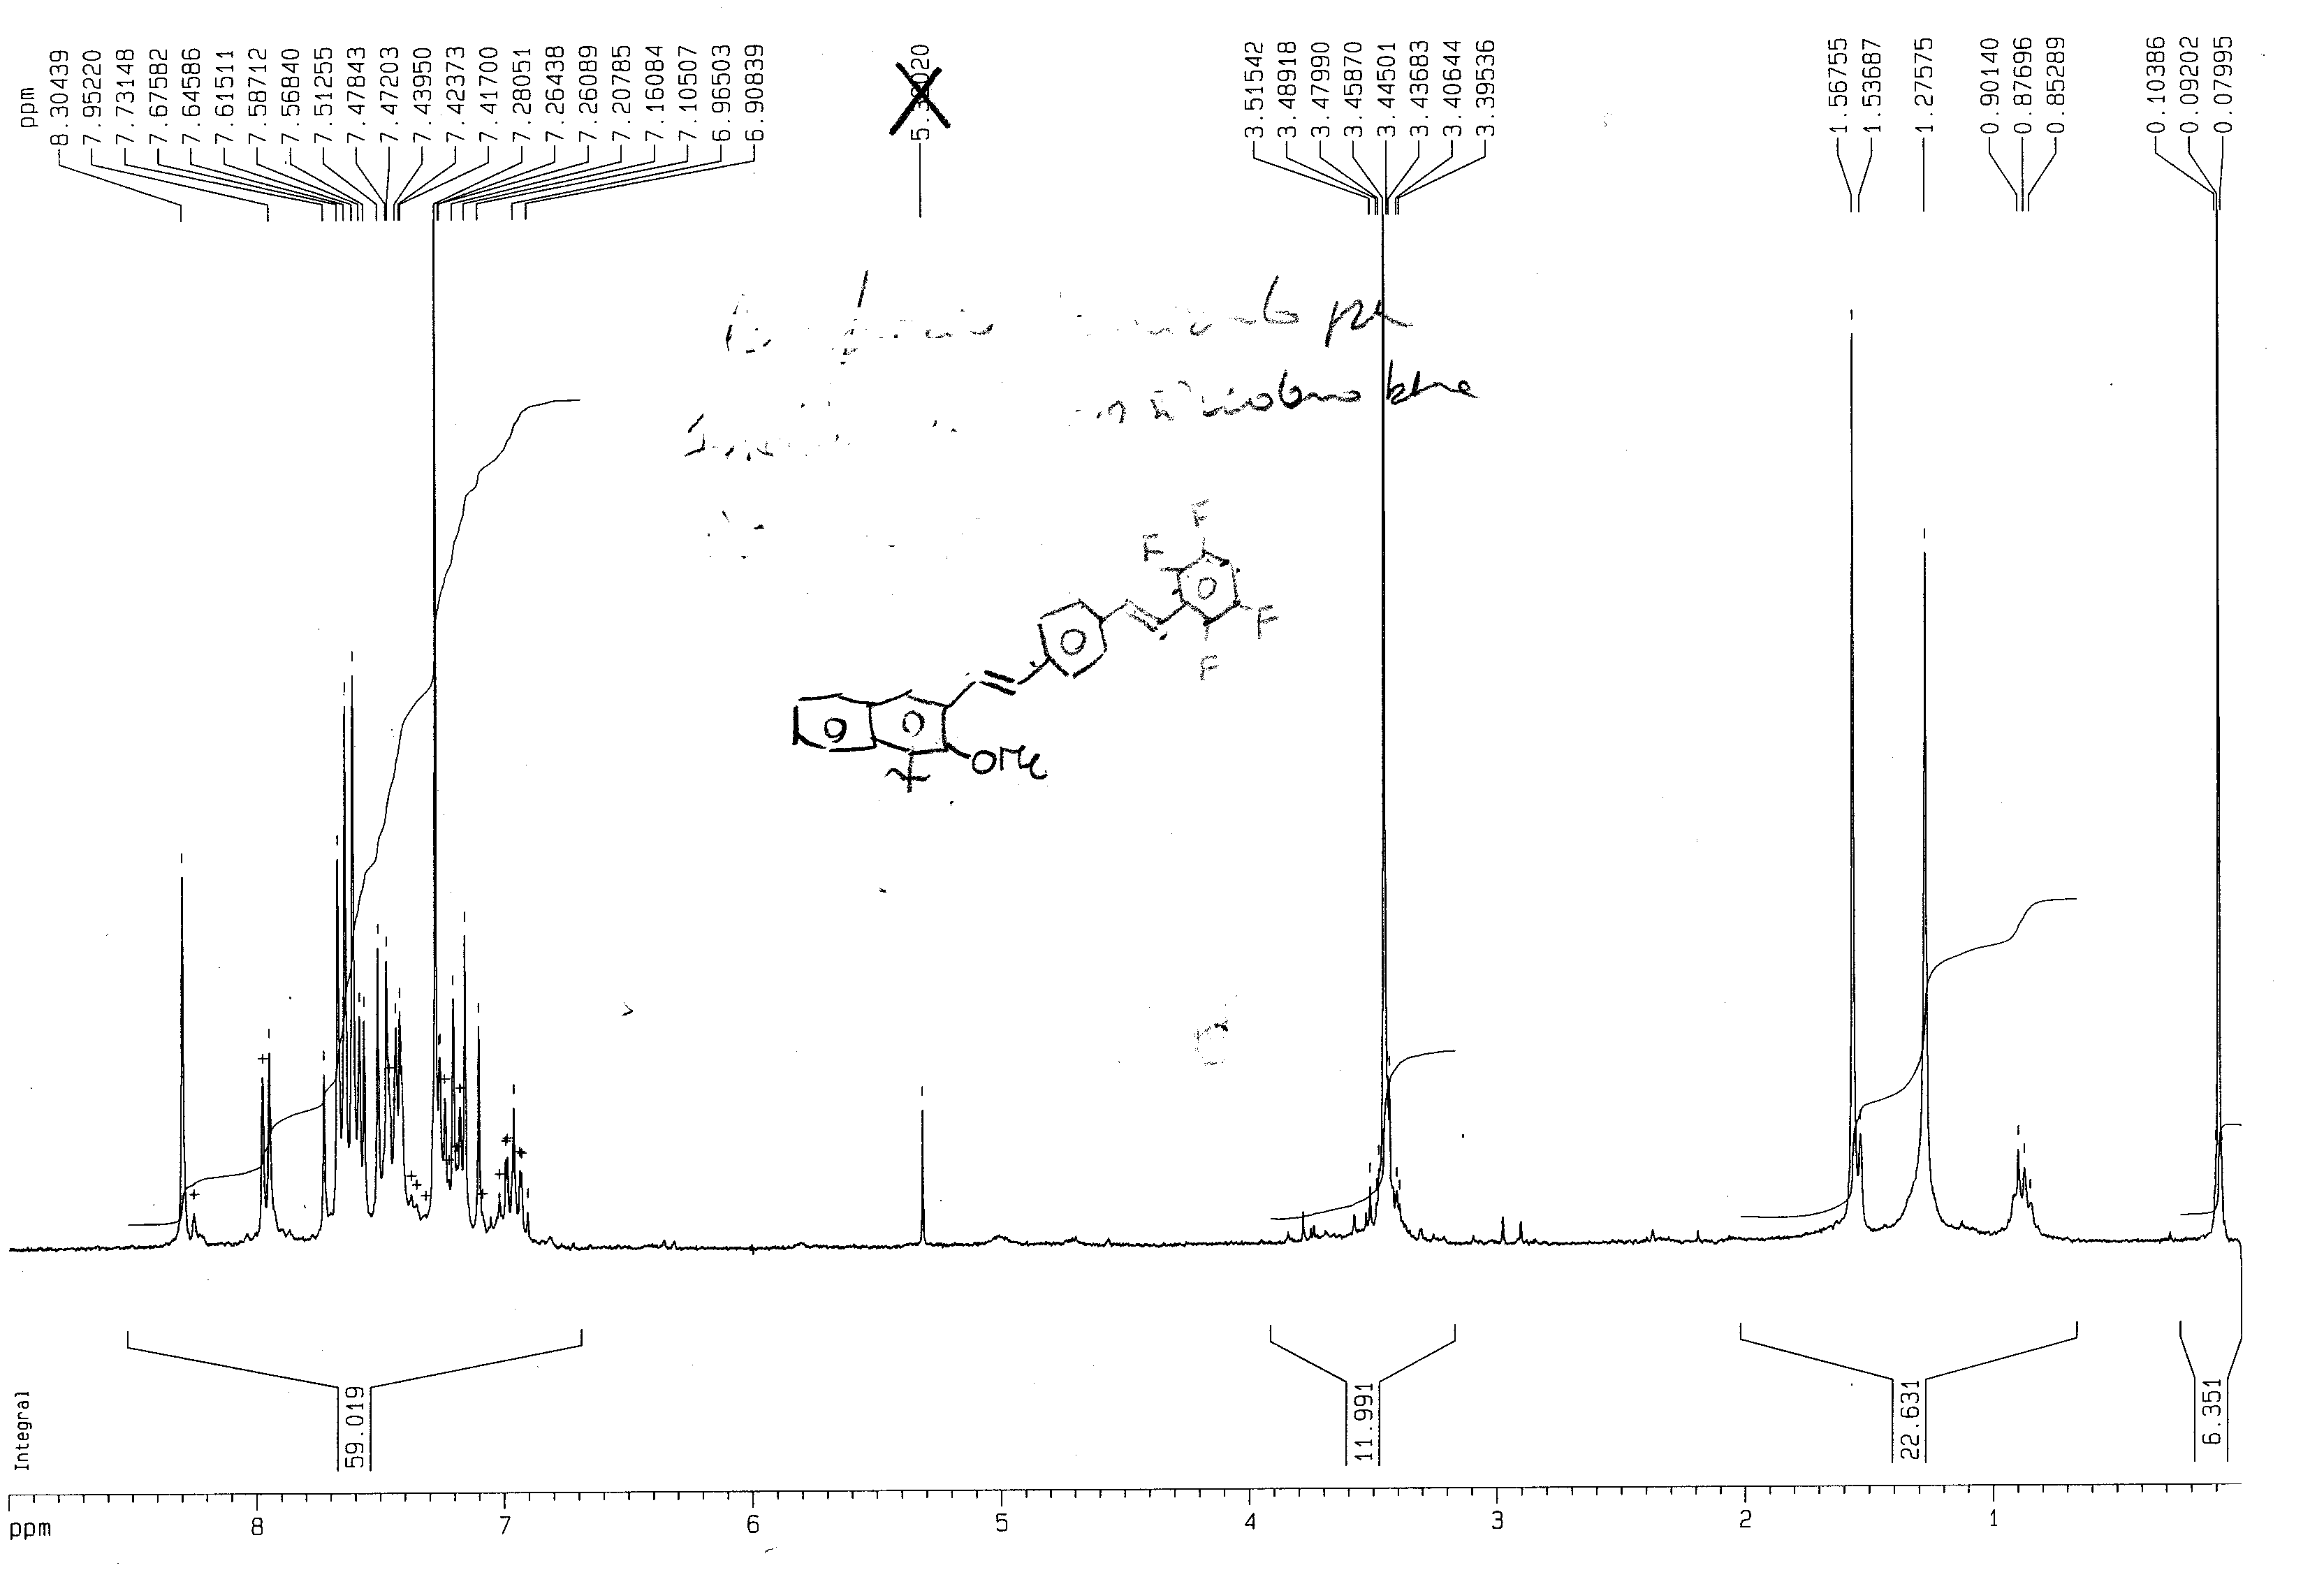


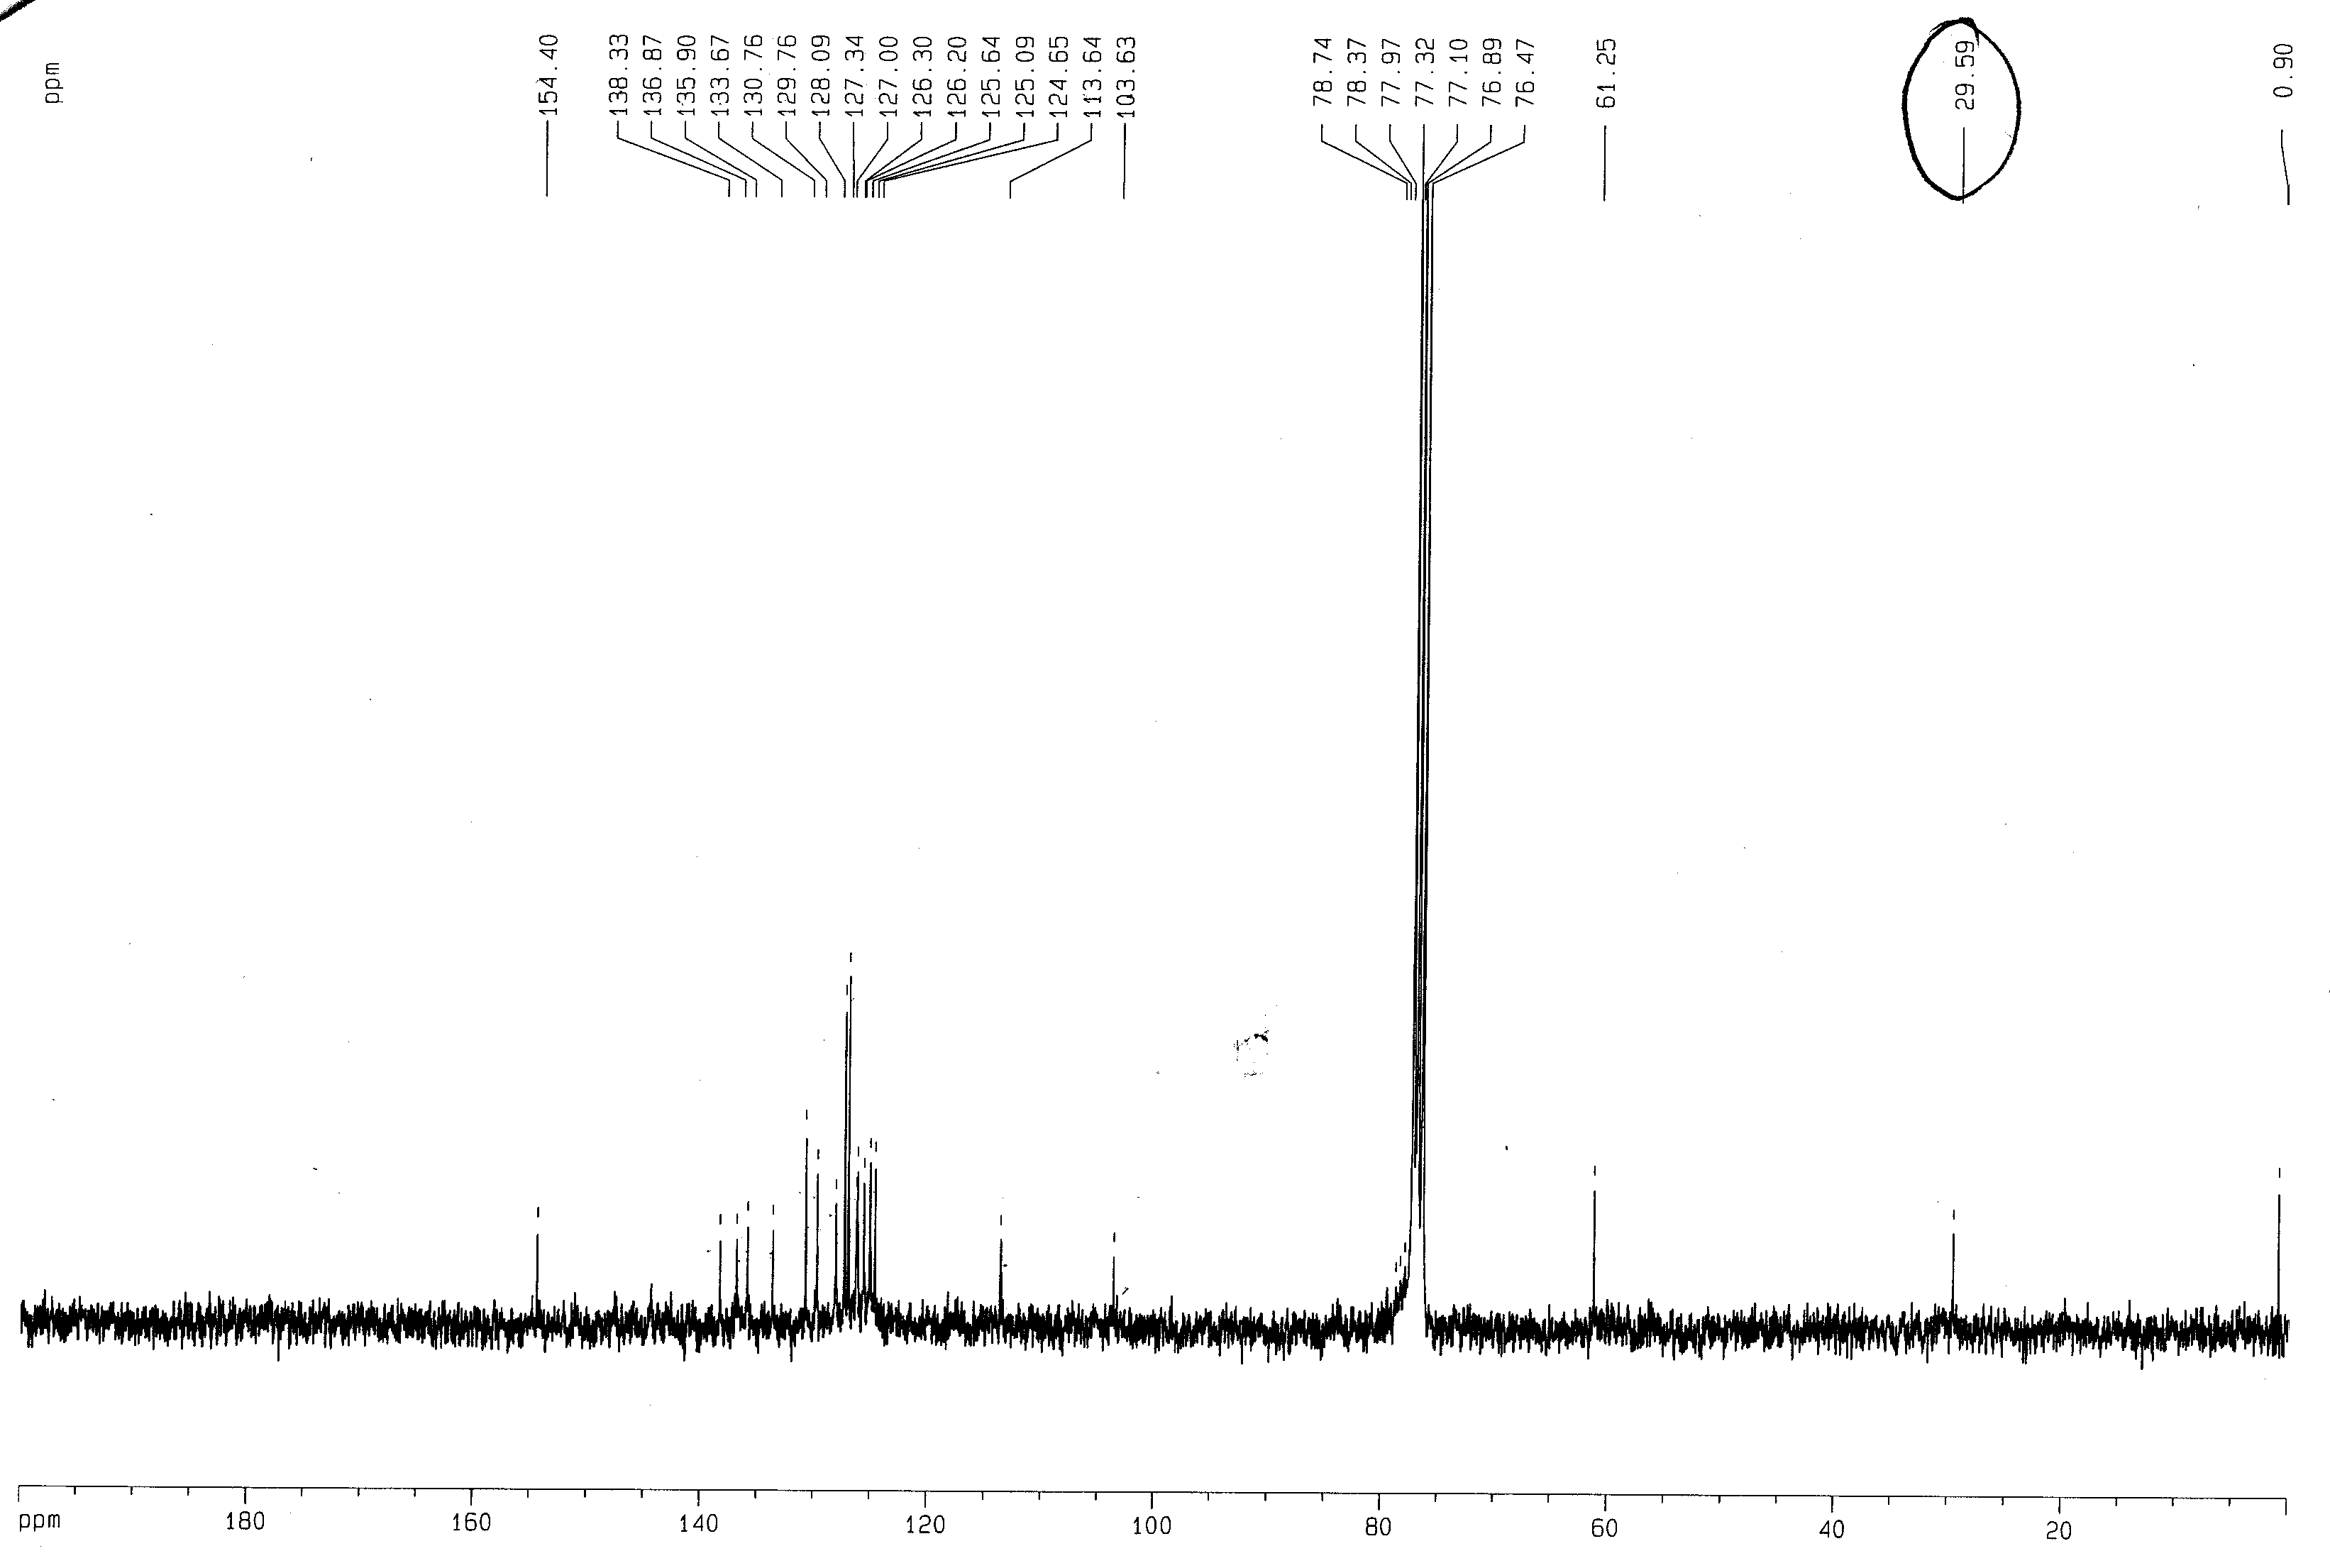


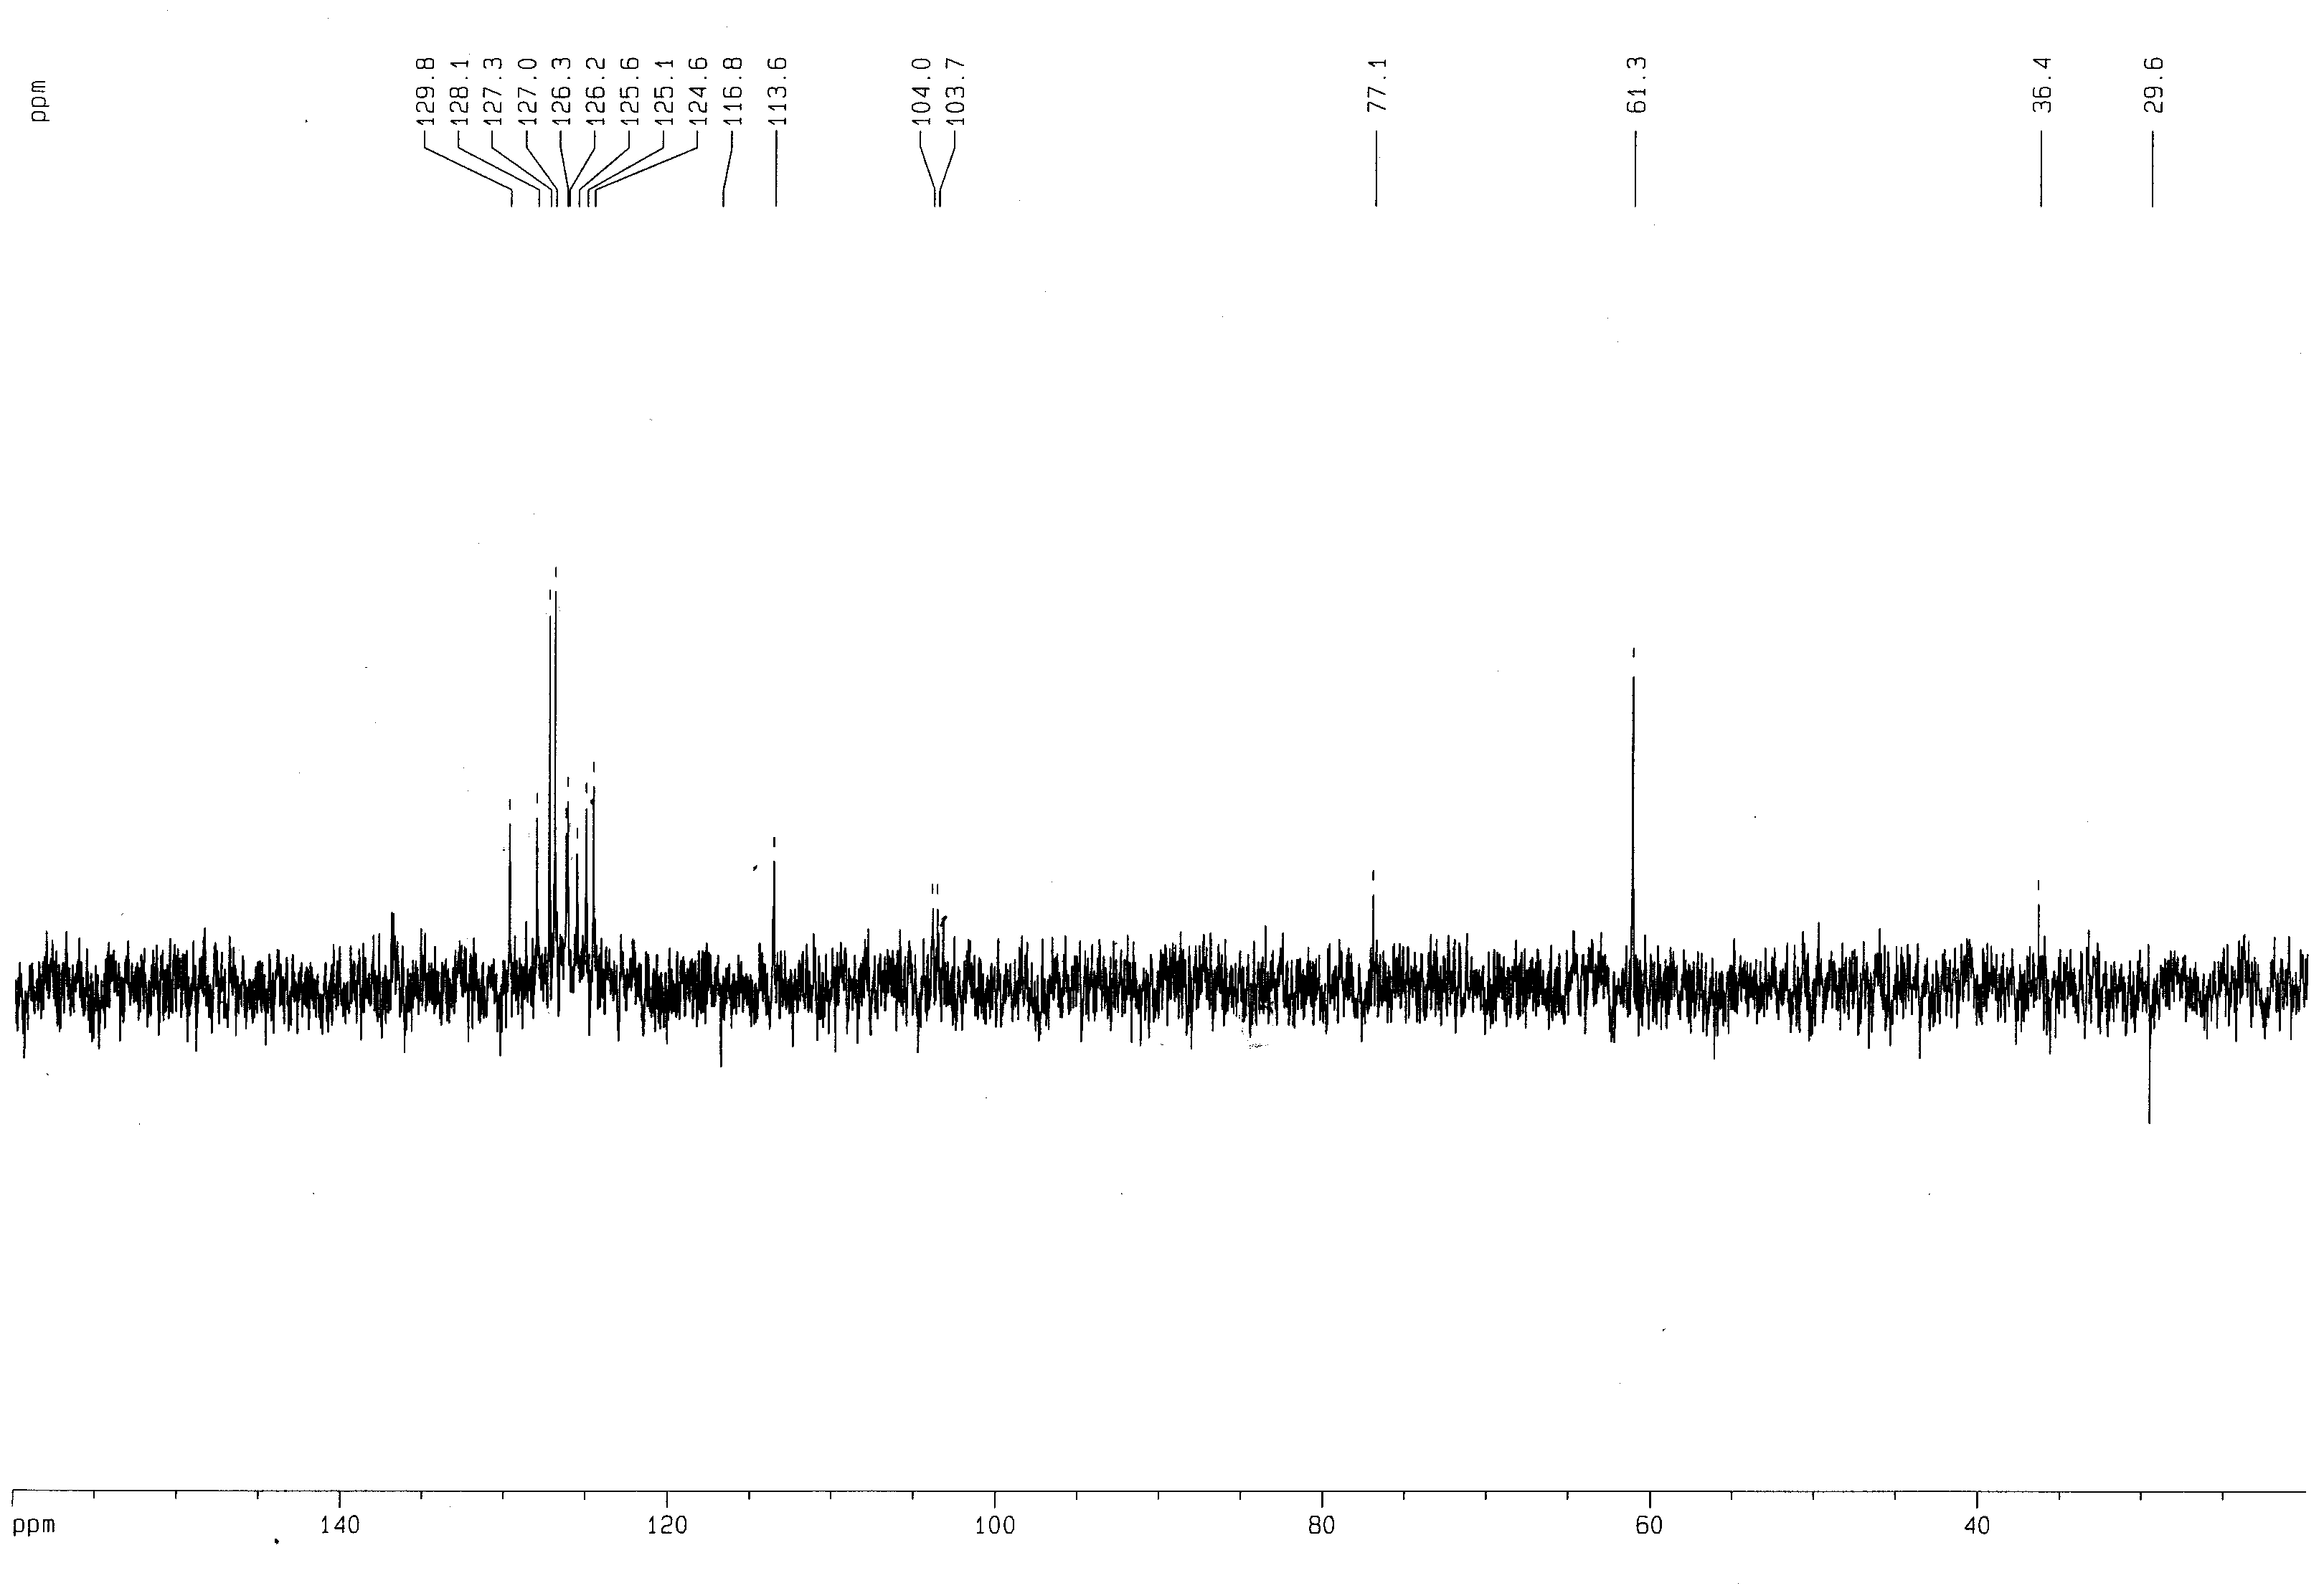


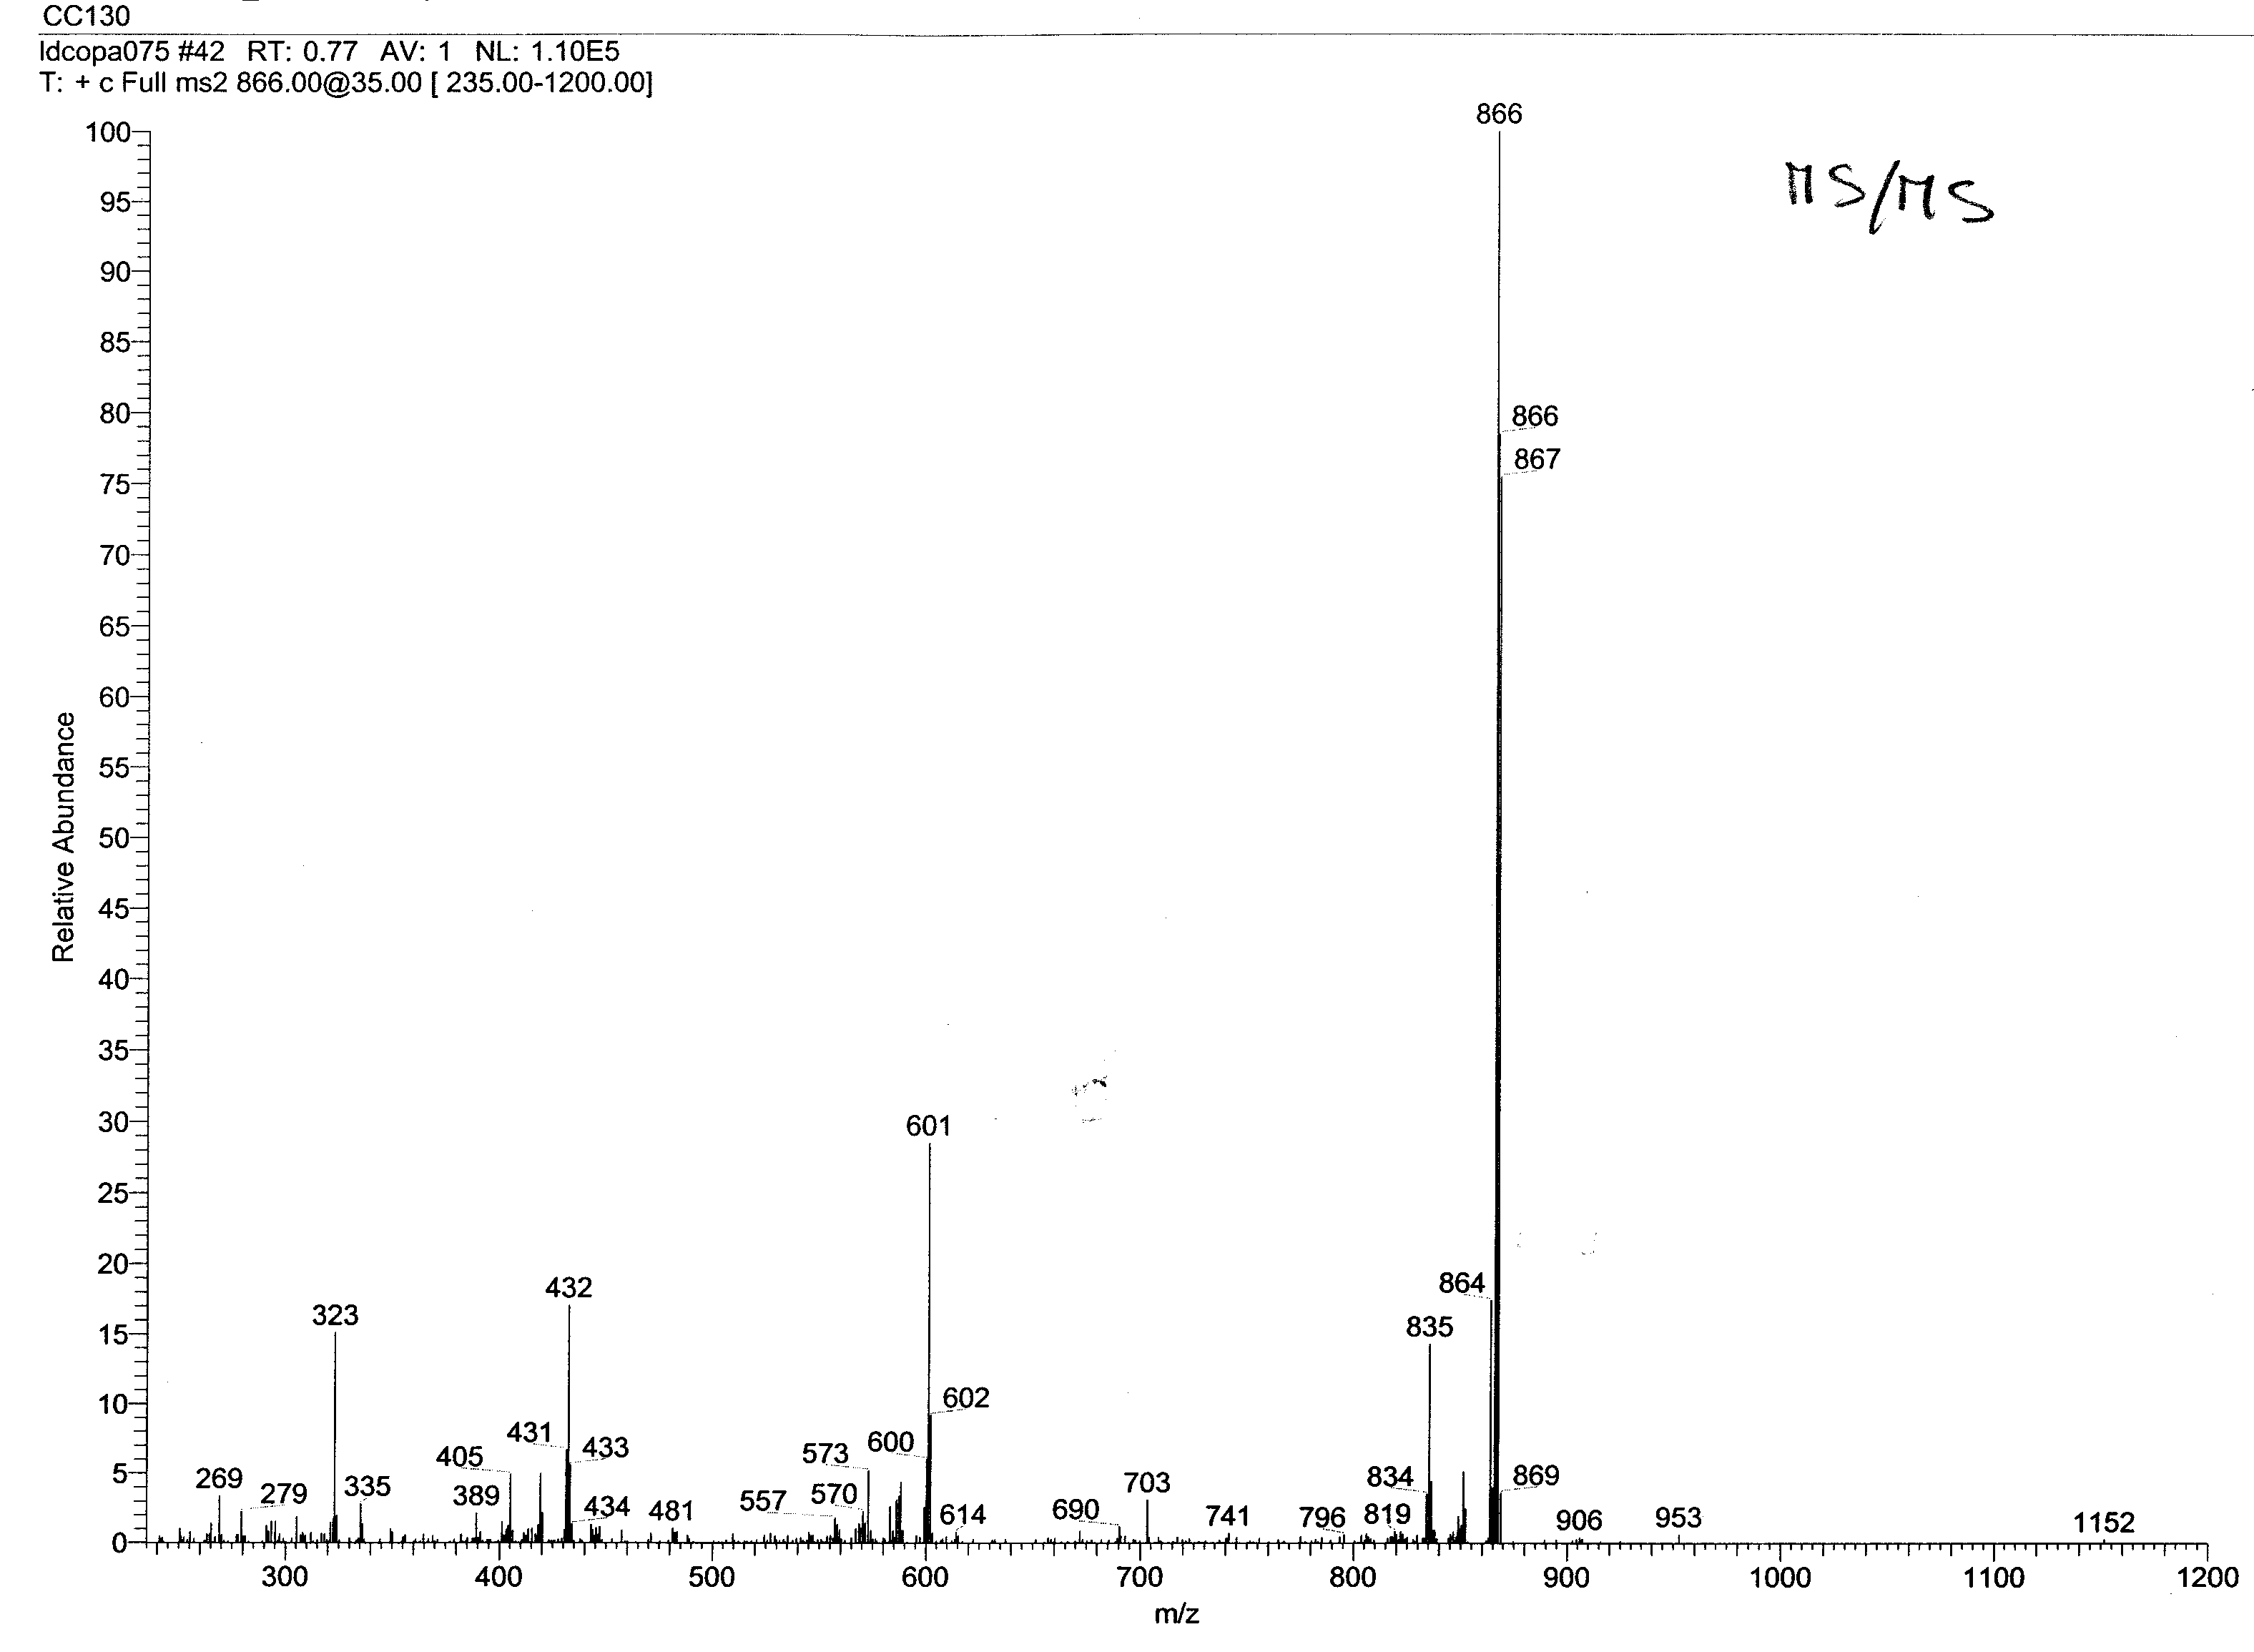

Supplement: f1 [file 827592.f1.doc]
